# Supplementary material for: Modulation of the photoelectrochemical behavior of Au nanocluster–TiO2 electrode by doping
Source: Royal Society of Chemistry journal article supplement (doi:10.1039/d0sc01220c), 2020-01-01
Supplement: d0sc01220c2.pdf [file d0sc01220c2.pdf]

## Supplementary Information S2

# Modulation of the photoelectrochemical behavior of Au nanocluster–TiO<sub>2</sub> electrode by doping

Malenahalli H. Naveen,<sup>a‡</sup> Rizwan Khan,<sup>b‡</sup> Muhammad A. Abbas,<sup>a‡</sup> Eunbyol Cho,<sup>c</sup> Geun Jun

Lee,<sup>b</sup> Hahkjoon Kim,<sup>d</sup> Eunji Sim,<sup>\*c</sup> and Jin Ho Bang<sup>\*abe</sup>

Nanosensor Research Institute, Department of Bionano Technology, Department of Chemical and Molecular Engineering, and Department of Applied Chemistry, Hanyang University, 55 Hanyangdaehak-ro, Sangnok-gu, Ansan, Gyeonggi-do 15588, Republic of Korea

Department of Chemistry, Yonsei University, Seoul 03722, Republic of Korea

Department of Chemistry, Duksung Women's University, Seoul 01369, Republic of Korea

### AUTHOR INFORMATION

\*Corresponding Authors

*E-mail addresses:* esim@yonsei.ac.kr (E. Sim), jbang@hanyang.ac.kr (J.H. Bang)

<sup>a</sup> Nanosensor Research Institute, Hanyang University

<sup>b</sup> Department of Bionano Technology, Hanyang University

<sup>c</sup> Department of Chemistry, Yonsei University

<sup>d</sup> Department of Chemistry, Duksung Women's University

<sup>e</sup> Department of Chemical and Molecular Engineering and Department of Applied Chemistry, Hanyang University

<sup>‡</sup> M. H. Naveen, R. Khan, and M. A. Abbas contributed equally to this work.

xyz coordinates of  $\text{Au}_{18}(\text{SCH}_3)_{14}$  and five lowest energy isomers of  $\text{Au}_{18-x}\text{Ag}_x(\text{SCH}_3)_{14}$  with  $1 \leq x \leq 4$  at each x value.

1.  $\text{Au}_{18}(\text{SCH}_3)_{14}$

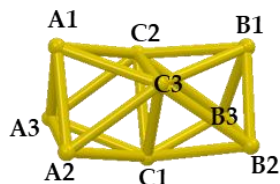

| 88 |          |          |          |
|----|----------|----------|----------|
| Au | -1.35123 | -1.31865 | 0.486057 |
| Au | 1.085413 | -2.45128 | -1.16965 |
| Au | 0.97715  | 0.198773 | 0.431214 |
| Au | -1.24084 | 0.877119 | -1.32279 |
| Au | -1.63455 | -4.76716 | -0.46317 |
| Au | -1.15282 | -1.78441 | -2.62773 |
| Au | 1.169357 | -0.16624 | -2.71148 |
| Au | 1.284511 | -2.53609 | 2.336542 |
| Au | -4.37998 | -0.7723  | -1.49112 |
| Au | 4.184213 | -0.37372 | -1.15638 |
| Au | -2.95353 | 1.199049 | 0.995678 |
| Au | -0.59688 | 2.730661 | 0.907507 |
| Au | 1.550572 | 3.283387 | -1.7515  |
| Au | -3.00601 | 3.952806 | -0.79288 |
| Au | -0.80221 | 0.553915 | 2.729338 |
| Au | 0.17356  | -4.5646  | -3.66974 |
| Au | 3.070538 | -2.32179 | -4.07943 |
| Au | -2.81587 | 3.658589 | 2.813612 |
| S  | -2.14031 | 2.78873  | -2.68124 |
| S  | -2.30458 | -3.42624 | 1.3677   |
| S  | -3.48418 | -1.81852 | -3.43015 |
| S  | 1.976591 | -3.96927 | 0.560493 |
| S  | 3.348471 | 0.876593 | 0.673653 |
| S  | -5.18583 | 0.300784 | 0.482298 |
| S  | 2.194468 | 1.909836 | -3.58354 |
| S  | 0.842125 | 4.574009 | 0.128162 |
| S  | 0.570064 | -1.09999 | 4.088148 |
| S  | -0.90554 | -6.14535 | -2.25694 |
| S  | 5.062228 | -1.55562 | -3.02544 |
| S  | -3.75665 | 5.120322 | 1.156312 |
| S  | -2.03582 | 2.120272 | 4.444517 |

|   |          |          |          |
|---|----------|----------|----------|
| S | 1.182794 | -3.13223 | -5.28324 |
| C | -4.141   | -3.34148 | 1.29552  |
| C | -4.06004 | -3.56664 | -3.39039 |
| C | 0.472746 | -7.11895 | -1.51163 |
| C | -6.2287  | 1.715419 | -0.06655 |
| C | 3.814065 | -3.88119 | 0.498812 |
| C | 4.005156 | 0.077948 | 2.196183 |
| C | -0.73097 | -2.04833 | 4.983305 |
| C | 1.110063 | 2.437296 | -4.97624 |
| C | -3.5861  | 2.193109 | -3.64829 |
| C | 1.877596 | -4.28141 | -6.54828 |
| C | 5.668636 | -0.21    | -4.13303 |
| C | 2.296022 | 4.614935 | 1.258818 |
| C | -2.68722 | 6.622166 | 1.20278  |
| C | -0.60286 | 2.933749 | 5.267607 |
| H | -4.53983 | -4.32607 | 1.576729 |
| H | -4.49647 | -3.0626  | 0.295152 |
| H | -4.47502 | -2.58588 | 2.019737 |
| H | -3.81448 | -4.05331 | -2.43703 |
| H | -3.55995 | -4.10062 | -4.21045 |
| H | -5.14684 | -3.57926 | -3.55153 |
| H | 0.984826 | -7.65998 | -2.31907 |
| H | 0.028554 | -7.83909 | -0.81043 |
| H | 1.177362 | -6.46783 | -0.97814 |
| H | -7.12757 | 1.315397 | -0.55574 |
| H | -5.68729 | 2.376854 | -0.75569 |
| H | -6.51852 | 2.283015 | 0.828718 |
| H | 4.148216 | -4.4627  | -0.37178 |
| H | 4.217757 | -4.32986 | 1.417063 |
| H | 4.168123 | -2.84628 | 0.39658  |
| H | 5.09443  | 0.220519 | 2.220032 |
| H | 3.761836 | -0.99198 | 2.23284  |
| H | 3.547671 | 0.577765 | 3.061289 |
| H | -0.24365 | -2.82867 | 5.584609 |
| H | -1.43995 | -2.50928 | 4.283079 |
| H | -1.26176 | -1.3494  | 5.645292 |
| H | 1.205465 | 1.693    | -5.77905 |
| H | 1.461208 | 3.414447 | -5.33657 |
| H | 0.063208 | 2.51483  | -4.65565 |
| H | -4.29711 | 1.64048  | -3.02003 |
| H | -3.21138 | 1.524711 | -4.43601 |
| H | -4.07996 | 3.0624   | -4.1044  |
| H | 1.036514 | -4.77021 | -7.05949 |

|   |          |          |          |
|---|----------|----------|----------|
| H | 2.530354 | -5.03896 | -6.09721 |
| H | 2.447851 | -3.68265 | -7.27215 |
| H | 5.967627 | -0.66442 | -5.08755 |
| H | 6.544625 | 0.24846  | -3.65366 |
| H | 4.89262  | 0.548675 | -4.29841 |
| H | 3.035903 | 5.310257 | 0.837761 |
| H | 2.744347 | 3.619054 | 1.367588 |
| H | 1.957511 | 4.989551 | 2.235095 |
| H | -3.01349 | 7.289817 | 0.393383 |
| H | -1.62852 | 6.364996 | 1.068754 |
| H | -2.83988 | 7.117308 | 2.171621 |
| H | 0.084303 | 3.382072 | 4.539119 |
| H | -0.0696  | 2.162032 | 5.840988 |
| H | -0.97696 | 3.708756 | 5.951233 |

2.  $\text{Au}_{17}\text{Ag}(\text{SCH}_3)_{14} : \text{C}_1$

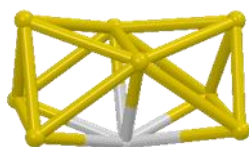

| 88 | C1       |          |          |
|----|----------|----------|----------|
| Au | -1.31034 | -1.3575  | 0.59601  |
| Au | 1.076744 | -2.47443 | -1.09398 |
| Au | 0.97268  | 0.173987 | 0.487414 |
| Ag | -1.25345 | 0.858067 | -1.39039 |
| Au | -1.65384 | -4.7969  | -0.49621 |
| Au | -1.13027 | -1.82977 | -2.58221 |
| Au | 1.183973 | -0.221   | -2.66555 |
| Au | 1.290927 | -2.51957 | 2.406708 |
| Au | -4.33934 | -0.73104 | -1.56634 |
| Au | 4.195326 | -0.37179 | -1.18213 |
| Au | -2.92517 | 1.151173 | 0.996272 |
| Au | -0.59264 | 2.686712 | 0.904696 |
| Au | 1.484074 | 3.244773 | -1.7973  |
| Au | -3.01853 | 3.958017 | -0.72618 |
| Au | -0.79683 | 0.546235 | 2.747835 |
| Au | 0.216947 | -4.61283 | -3.66972 |
| Au | 3.109852 | -2.364   | -4.08173 |
| Au | -2.78784 | 3.608147 | 2.8886   |
| S  | -2.21178 | 2.878657 | -2.67855 |

|   |          |          |          |
|---|----------|----------|----------|
| S | -2.39159 | -3.46912 | 1.316765 |
| S | -3.41843 | -1.79031 | -3.48426 |
| S | 1.987678 | -3.97105 | 0.646027 |
| S | 3.346993 | 0.908909 | 0.618769 |
| S | -5.15973 | 0.314739 | 0.411584 |
| S | 2.13832  | 1.850154 | -3.60707 |
| S | 0.787139 | 4.550699 | 0.073628 |
| S | 0.581331 | -1.07576 | 4.15316  |
| S | -0.86571 | -6.18685 | -2.25516 |
| S | 5.091325 | -1.57867 | -3.02549 |
| S | -3.75159 | 5.079497 | 1.259394 |
| S | -1.98788 | 2.069474 | 4.511083 |
| S | 1.222574 | -3.17763 | -5.28035 |
| C | -4.21865 | -3.34318 | 1.148587 |
| C | -4.0408  | -3.5237  | -3.45936 |
| C | 0.509194 | -7.13178 | -1.46756 |
| C | -6.17803 | 1.755901 | -0.11203 |
| C | 3.823681 | -3.86153 | 0.571374 |
| C | 4.03616  | 0.162518 | 2.154106 |
| C | -0.72352 | -2.01153 | 5.056303 |
| C | 1.026935 | 2.317921 | -5.00032 |
| C | -3.69231 | 2.357651 | -3.63921 |
| C | 1.916321 | -4.32095 | -6.55114 |
| C | 5.695428 | -0.24417 | -4.1482  |
| C | 2.263477 | 4.62799  | 1.173272 |
| C | -2.70244 | 6.594462 | 1.320566 |
| C | -0.54261 | 2.879333 | 5.315956 |
| H | -4.6526  | -4.32568 | 1.38155  |
| H | -4.51389 | -3.0313  | 0.138252 |
| H | -4.57631 | -2.5991  | 1.87341  |
| H | -3.8381  | -4.01429 | -2.49811 |
| H | -3.52798 | -4.07142 | -4.2623  |
| H | -5.12172 | -3.50902 | -3.65583 |
| H | 1.044821 | -7.67692 | -2.2567  |
| H | 0.059794 | -7.84834 | -0.76608 |
| H | 1.194701 | -6.46517 | -0.92849 |
| H | -7.0743  | 1.379367 | -0.62423 |
| H | -5.61804 | 2.429061 | -0.7745  |
| H | -6.47362 | 2.301859 | 0.794661 |
| H | 4.159498 | -4.45754 | -0.28879 |
| H | 4.23924  | -4.28516 | 1.496144 |
| H | 4.163729 | -2.82472 | 0.444279 |
| H | 5.125096 | 0.309788 | 2.155541 |

|   |          |          |          |
|---|----------|----------|----------|
| H | 3.798823 | -0.90678 | 2.228848 |
| H | 3.591345 | 0.687919 | 3.010679 |
| H | -0.23978 | -2.78392 | 5.670596 |
| H | -1.43164 | -2.48087 | 4.3611   |
| H | -1.25619 | -1.30225 | 5.7057   |
| H | 1.117651 | 1.547326 | -5.77828 |
| H | 1.363838 | 3.285314 | -5.39838 |
| H | -0.01548 | 2.398104 | -4.66641 |
| H | -4.36839 | 1.730637 | -3.04196 |
| H | -3.33979 | 1.773556 | -4.50118 |
| H | -4.22441 | 3.250247 | -3.99601 |
| H | 1.074943 | -4.81033 | -7.0612  |
| H | 2.57253  | -5.07821 | -6.10479 |
| H | 2.482534 | -3.71846 | -7.27512 |
| H | 6.001594 | -0.7094  | -5.0952  |
| H | 6.566303 | 0.226311 | -3.67117 |
| H | 4.915854 | 0.507389 | -4.32795 |
| H | 2.979747 | 5.335403 | 0.731968 |
| H | 2.734418 | 3.642156 | 1.278612 |
| H | 1.93793  | 5.002347 | 2.153975 |
| H | -3.04925 | 7.272845 | 0.52878  |
| H | -1.6426  | 6.354767 | 1.164952 |
| H | -2.84626 | 7.069403 | 2.300811 |
| H | 0.128304 | 3.339462 | 4.579619 |
| H | 0.005397 | 2.104024 | 5.870287 |
| H | -0.90679 | 3.645028 | 6.015271 |

### 3. $\text{Au}_{17}\text{Ag}(\text{SCH}_3)_{14} : \text{A1}$

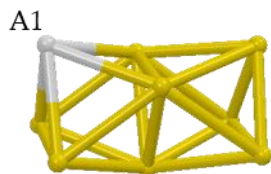

88

|    |          |          |          |
|----|----------|----------|----------|
| Au | -1.38224 | -1.27468 | 0.467268 |
| Au | 1.068772 | -2.40558 | -1.22183 |
| Au | 0.962663 | 0.234937 | 0.414251 |
| Au | -1.23029 | 0.894614 | -1.33912 |
| Au | -1.62408 | -4.73193 | -0.43712 |
| Au | -1.1711  | -1.73548 | -2.68072 |
| Au | 1.150123 | -0.12127 | -2.76618 |

|    |          |          |          |
|----|----------|----------|----------|
| Au | 1.291939 | -2.55046 | 2.295783 |
| Au | -4.40179 | -0.79303 | -1.4472  |
| Au | 4.166752 | -0.3699  | -1.1389  |
| Au | -2.94356 | 1.219689 | 0.946367 |
| Au | -0.60889 | 2.713394 | 0.874649 |
| Au | 1.600413 | 3.297974 | -1.70776 |
| Au | -2.98669 | 3.949157 | -0.88733 |
| Ag | -0.81343 | 0.534859 | 2.81046  |
| Au | 0.153301 | -4.54557 | -3.66802 |
| Au | 3.052576 | -2.3062  | -4.07921 |
| Au | -2.83289 | 3.697134 | 2.723362 |
| S  | -2.13079 | 2.763647 | -2.76395 |
| S  | -2.26631 | -3.38448 | 1.400491 |
| S  | -3.52611 | -1.80748 | -3.41308 |
| S  | 1.954326 | -3.95048 | 0.479804 |
| S  | 3.338609 | 0.858731 | 0.710409 |
| S  | -5.18541 | 0.257392 | 0.550212 |
| S  | 2.224245 | 1.956713 | -3.57227 |
| S  | 0.90136  | 4.559697 | 0.196642 |
| S  | 0.614746 | -1.17338 | 4.101712 |
| S  | -0.92896 | -6.11338 | -2.24154 |
| S  | 5.039702 | -1.53707 | -3.01853 |
| S  | -3.73603 | 5.150839 | 1.037012 |
| S  | -2.1017  | 2.200391 | 4.407276 |
| S  | 1.17557  | -3.132   | -5.29092 |
| C  | -4.10561 | -3.33315 | 1.371227 |
| C  | -4.06958 | -3.56587 | -3.37318 |
| C  | 0.449879 | -7.09901 | -1.5132  |
| C  | -6.26885 | 1.651421 | 0.025666 |
| C  | 3.792507 | -3.89389 | 0.406671 |
| C  | 3.985412 | 0.027465 | 2.218928 |
| C  | -0.65327 | -2.16863 | 4.995517 |
| C  | 1.166444 | 2.545301 | -4.96117 |
| C  | -3.58426 | 2.139229 | -3.70164 |
| C  | 1.884778 | -4.29827 | -6.5322  |
| C  | 5.649671 | -0.18594 | -4.11701 |
| C  | 2.338209 | 4.554504 | 1.34753  |
| C  | -2.64701 | 6.639291 | 1.074324 |
| C  | -0.70808 | 3.058104 | 5.255679 |
| H  | -4.47796 | -4.31836 | 1.68482  |
| H  | -4.48977 | -3.08578 | 0.373339 |
| H  | -4.43736 | -2.56695 | 2.085163 |
| H  | -3.7976  | -4.05301 | -2.42728 |

|   |          |          |          |
|---|----------|----------|----------|
| H | -3.57655 | -4.08665 | -4.20588 |
| H | -5.15896 | -3.59658 | -3.51338 |
| H | 0.948772 | -7.64293 | -2.32695 |
| H | 0.008217 | -7.81661 | -0.8078  |
| H | 1.164637 | -6.45299 | -0.98694 |
| H | -7.17677 | 1.234053 | -0.43148 |
| H | -5.76161 | 2.315931 | -0.68584 |
| H | -6.539   | 2.22074  | 0.92605  |
| H | 4.111228 | -4.44951 | -0.48642 |
| H | 4.193053 | -4.3828  | 1.305636 |
| H | 4.16531  | -2.86265 | 0.340179 |
| H | 5.076098 | 0.158862 | 2.24328  |
| H | 3.730404 | -1.04023 | 2.237082 |
| H | 3.533988 | 0.51681  | 3.093075 |
| H | -0.15325 | -2.97948 | 5.543355 |
| H | -1.38834 | -2.5952  | 4.3001   |
| H | -1.1602  | -1.50403 | 5.709783 |
| H | 1.264803 | 1.827141 | -5.78717 |
| H | 1.534705 | 3.529325 | -5.28367 |
| H | 0.116027 | 2.624495 | -4.65275 |
| H | -4.29126 | 1.608337 | -3.0508  |
| H | -3.21589 | 1.445745 | -4.47031 |
| H | -4.08084 | 2.994156 | -4.18138 |
| H | 1.049933 | -4.79513 | -7.04586 |
| H | 2.533236 | -5.04872 | -6.06349 |
| H | 2.462582 | -3.70899 | -7.25786 |
| H | 5.948625 | -0.63532 | -5.07393 |
| H | 6.526357 | 0.267091 | -3.63364 |
| H | 4.875723 | 0.57575  | -4.27793 |
| H | 3.096451 | 5.244198 | 0.950729 |
| H | 2.767789 | 3.54919  | 1.444171 |
| H | 1.991504 | 4.917303 | 2.325437 |
| H | -2.94885 | 7.295092 | 0.246074 |
| H | -1.58909 | 6.366552 | 0.966752 |
| H | -2.81197 | 7.155592 | 2.030065 |
| H | 0.03107  | 3.44265  | 4.541235 |
| H | -0.22391 | 2.322587 | 5.91417  |
| H | -1.10173 | 3.886334 | 5.861121 |

4.  $\text{Au}_{17}\text{Ag}(\text{SCH}_3)_{14} : \text{C}_2$



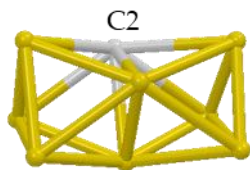

88

|    |          |          |          |
|----|----------|----------|----------|
| Au | -1.42466 | -1.28831 | 0.438099 |
| Au | 1.044927 | -2.45538 | -1.1546  |
| Ag | 1.006757 | 0.170211 | 0.430504 |
| Au | -1.27916 | 0.876892 | -1.33738 |
| Au | -1.61299 | -4.76778 | -0.44875 |
| Au | -1.1833  | -1.78766 | -2.61766 |
| Au | 1.137701 | -0.17038 | -2.6951  |
| Au | 1.301727 | -2.50764 | 2.323565 |
| Au | -4.41192 | -0.76933 | -1.49586 |
| Au | 4.192967 | -0.36634 | -1.13597 |
| Au | -2.99158 | 1.20029  | 0.975333 |
| Au | -0.62643 | 2.682562 | 0.895243 |
| Au | 1.572798 | 3.239318 | -1.70903 |
| Au | -3.00384 | 3.975738 | -0.82922 |
| Au | -0.87222 | 0.511391 | 2.714055 |
| Au | 0.155912 | -4.56323 | -3.67321 |
| Au | 3.042355 | -2.31545 | -4.08043 |
| Au | -2.86049 | 3.674363 | 2.787961 |
| S  | -2.12144 | 2.81969  | -2.7139  |
| S  | -2.26084 | -3.42752 | 1.389598 |
| S  | -3.51152 | -1.83108 | -3.42501 |
| S  | 1.985297 | -3.9553  | 0.559443 |
| S  | 3.428179 | 0.885167 | 0.717232 |
| S  | -5.23651 | 0.318657 | 0.46093  |
| S  | 2.204225 | 1.885001 | -3.55915 |
| S  | 0.851456 | 4.512213 | 0.17474  |
| S  | 0.566864 | -1.06642 | 4.059443 |
| S  | -0.90616 | -6.14677 | -2.25109 |
| S  | 5.031784 | -1.55772 | -3.02167 |
| S  | -3.77423 | 5.135253 | 1.114797 |
| S  | -2.09141 | 2.151802 | 4.434867 |
| S  | 1.153324 | -3.12245 | -5.28576 |
| C  | -4.10046 | -3.37047 | 1.35771  |
| C  | -4.08224 | -3.58048 | -3.36507 |
| C  | 0.481166 | -7.12018 | -1.52259 |
| C  | -6.2646  | 1.735086 | -0.11168 |
| C  | 3.820824 | -3.85634 | 0.466418 |
| C  | 4.116287 | 0.063613 | 2.214902 |

|   |          |          |          |
|---|----------|----------|----------|
| C | -0.68851 | -2.0508  | 4.981834 |
| C | 1.127022 | 2.446021 | -4.94465 |
| C | -3.56254 | 2.229994 | -3.69324 |
| C | 1.851039 | -4.26618 | -6.55437 |
| C | 5.652677 | -0.22049 | -4.13077 |
| C | 2.285342 | 4.546879 | 1.330253 |
| C | -2.70194 | 6.634633 | 1.178832 |
| C | -0.64233 | 2.961932 | 5.232665 |
| H | -4.48088 | -4.36156 | 1.641587 |
| H | -4.48127 | -3.0905  | 0.366984 |
| H | -4.42826 | -2.62353 | 2.093767 |
| H | -3.83387 | -4.05559 | -2.40666 |
| H | -3.58234 | -4.12228 | -4.1801  |
| H | -5.16932 | -3.5977  | -3.52389 |
| H | 0.984373 | -7.66051 | -2.33607 |
| H | 0.045426 | -7.8408  | -0.81664 |
| H | 1.191643 | -6.46919 | -0.99697 |
| H | -7.16242 | 1.337907 | -0.60511 |
| H | -5.71204 | 2.386023 | -0.80189 |
| H | -6.55791 | 2.313141 | 0.775746 |
| H | 4.143506 | -4.43373 | -0.41116 |
| H | 4.240979 | -4.30563 | 1.376909 |
| H | 4.16617  | -2.8188  | 0.361477 |
| H | 5.209425 | 0.173463 | 2.215926 |
| H | 3.845851 | -0.99977 | 2.259017 |
| H | 3.696798 | 0.57179  | 3.094667 |
| H | -0.16537 | -2.81158 | 5.577958 |
| H | -1.39429 | -2.53755 | 4.296004 |
| H | -1.2288  | -1.36498 | 5.64971  |
| H | 1.205787 | 1.706998 | -5.75411 |
| H | 1.497852 | 3.418783 | -5.29705 |
| H | 0.08281  | 2.542786 | -4.62056 |
| H | -4.27294 | 1.666926 | -3.07355 |
| H | -3.18209 | 1.572782 | -4.48766 |
| H | -4.06017 | 3.101316 | -4.14148 |
| H | 1.012028 | -4.75727 | -7.06664 |
| H | 2.507613 | -5.02194 | -6.10597 |
| H | 2.4185   | -3.66308 | -7.27677 |
| H | 5.947889 | -0.67794 | -5.08507 |
| H | 6.532789 | 0.229511 | -3.65077 |
| H | 4.884591 | 0.546128 | -4.29633 |
| H | 3.022973 | 5.258507 | 0.933282 |
| H | 2.743627 | 3.554372 | 1.426936 |

|   |          |          |          |
|---|----------|----------|----------|
| H | 1.926162 | 4.900025 | 2.307065 |
| H | -3.01216 | 7.303088 | 0.363834 |
| H | -1.64176 | 6.37464  | 1.063417 |
| H | -2.86918 | 7.130663 | 2.14484  |
| H | 0.054825 | 3.37125  | 4.49064  |
| H | -0.1248  | 2.19766  | 5.830102 |
| H | -0.99638 | 3.76656  | 5.892349 |

5.  $\text{Au}_{17}\text{Ag}(\text{SCH}_3)_{14} : \text{A}_3$

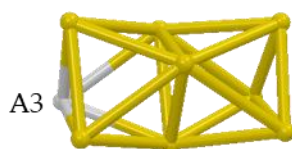

88

|    |          |          |          |
|----|----------|----------|----------|
| Au | -1.34672 | -1.35346 | 0.508984 |
| Au | 1.052042 | -2.48537 | -1.17422 |
| Au | 0.95113  | 0.194827 | 0.464556 |
| Au | -1.26912 | 0.849649 | -1.27103 |
| Au | -1.64893 | -4.7948  | -0.47427 |
| Au | -1.18524 | -1.81371 | -2.62176 |
| Au | 1.126002 | -0.19025 | -2.70298 |
| Au | 1.323843 | -2.52722 | 2.334963 |
| Au | -4.43934 | -0.75497 | -1.52755 |
| Au | 4.148246 | -0.34579 | -1.14324 |
| Au | -3.01591 | 1.105751 | 1.022205 |
| Ag | -0.61638 | 2.736156 | 0.900697 |
| Au | 1.519904 | 3.287666 | -1.72239 |
| Au | -2.97194 | 3.938214 | -0.7759  |
| Au | -0.87199 | 0.503193 | 2.720709 |
| Au | 0.174888 | -4.5988  | -3.67067 |
| Au | 3.061188 | -2.3325  | -4.05837 |
| Au | -2.80364 | 3.626028 | 2.815416 |
| S  | -2.10323 | 2.768692 | -2.65395 |
| S  | -2.32929 | -3.46024 | 1.358418 |
| S  | -3.51381 | -1.83171 | -3.434   |
| S  | 1.985474 | -3.97476 | 0.559578 |
| S  | 3.302185 | 0.918967 | 0.674615 |
| S  | -5.28127 | 0.346512 | 0.415928 |
| S  | 2.160576 | 1.889454 | -3.54158 |
| S  | 0.852563 | 4.636557 | 0.123021 |
| S  | 0.636693 | -1.07629 | 4.085772 |

|   |          |          |          |
|---|----------|----------|----------|
| S | -0.90835 | -6.17861 | -2.2599  |
| S | 5.039907 | -1.54204 | -2.99604 |
| S | -3.73615 | 5.096255 | 1.169018 |
| S | -2.03742 | 2.067614 | 4.430902 |
| S | 1.190361 | -3.16219 | -5.27594 |
| C | -4.16312 | -3.34501 | 1.260702 |
| C | -4.10459 | -3.57493 | -3.3811  |
| C | 0.468266 | -7.1461  | -1.50321 |
| C | -6.24207 | 1.804262 | -0.16718 |
| C | 3.820974 | -3.87896 | 0.462    |
| C | 3.983204 | 0.148386 | 2.201396 |
| C | -0.61113 | -2.04409 | 5.035567 |
| C | 1.106171 | 2.428041 | -4.95244 |
| C | -3.54964 | 2.200539 | -3.63795 |
| C | 1.90527  | -4.30571 | -6.53453 |
| C | 5.643033 | -0.20265 | -4.11273 |
| C | 2.324482 | 4.684816 | 1.231902 |
| C | -2.69737 | 6.618475 | 1.228058 |
| C | -0.58484 | 2.840912 | 5.259835 |
| H | -4.58262 | -4.32962 | 1.509792 |
| H | -4.49943 | -3.03397 | 0.262942 |
| H | -4.49602 | -2.60393 | 2.000414 |
| H | -3.8674  | -4.05478 | -2.42217 |
| H | -3.60414 | -4.12006 | -4.19361 |
| H | -5.19061 | -3.58089 | -3.54806 |
| H | 0.984452 | -7.69071 | -2.30564 |
| H | 0.022889 | -7.86326 | -0.79973 |
| H | 1.170164 | -6.49127 | -0.97079 |
| H | -7.13587 | 1.442974 | -0.69445 |
| H | -5.64699 | 2.44558  | -0.83056 |
| H | -6.54507 | 2.380533 | 0.718093 |
| H | 4.140824 | -4.45624 | -0.41678 |
| H | 4.244204 | -4.3288  | 1.370848 |
| H | 4.168706 | -2.84217 | 0.356736 |
| H | 5.067796 | 0.323894 | 2.221159 |
| H | 3.77257  | -0.92816 | 2.243662 |
| H | 3.512769 | 0.638488 | 3.065017 |
| H | -0.08898 | -2.81513 | 5.6193   |
| H | -1.34141 | -2.51872 | 4.367019 |
| H | -1.12757 | -1.3532  | 5.7173   |
| H | 1.209829 | 1.685636 | -5.75602 |
| H | 1.470979 | 3.403697 | -5.30336 |
| H | 0.054504 | 2.513261 | -4.64993 |

|   |          |          |          |
|---|----------|----------|----------|
| H | -4.2777  | 1.658803 | -3.01982 |
| H | -3.1763  | 1.527391 | -4.42225 |
| H | -4.02187 | 3.079476 | -4.09854 |
| H | 1.072874 | -4.80052 | -7.05413 |
| H | 2.559113 | -5.05868 | -6.07753 |
| H | 2.478243 | -3.70254 | -7.25263 |
| H | 5.946656 | -0.66327 | -5.06285 |
| H | 6.515572 | 0.263855 | -3.63478 |
| H | 4.863744 | 0.550858 | -4.28569 |
| H | 3.078574 | 5.350136 | 0.788724 |
| H | 2.755085 | 3.684593 | 1.37008  |
| H | 2.005434 | 5.096081 | 2.200531 |
| H | -3.03583 | 7.281943 | 0.420388 |
| H | -1.63309 | 6.384997 | 1.095569 |
| H | -2.86458 | 7.105406 | 2.198474 |
| H | 0.0991   | 3.305747 | 4.538612 |
| H | -0.05328 | 2.046922 | 5.803421 |
| H | -0.94554 | 3.598195 | 5.969991 |

## 6. $\text{Au}_{17}\text{Ag}(\text{SCH}_3)_{14} : \text{A}_2$

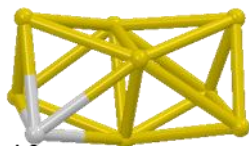

88 A2

|    |          |          |          |
|----|----------|----------|----------|
| Au | -1.36494 | -1.29356 | 0.506237 |
| Au | 1.125182 | -2.44099 | -1.18628 |
| Au | 0.980549 | 0.181565 | 0.426096 |
| Au | -1.23405 | 0.89724  | -1.27864 |
| Au | -1.6397  | -4.74329 | -0.4509  |
| Au | -1.12451 | -1.75877 | -2.61962 |
| Au | 1.193907 | -0.15295 | -2.71618 |
| Au | 1.287758 | -2.57883 | 2.325164 |
| Au | -4.37257 | -0.75251 | -1.44906 |
| Au | 4.191547 | -0.37516 | -1.14903 |
| Ag | -2.97467 | 1.253402 | 0.991981 |
| Au | -0.50317 | 2.733894 | 0.932372 |
| Au | 1.525325 | 3.322984 | -1.79678 |
| Au | -3.00117 | 3.954058 | -0.75216 |
| Au | -0.75775 | 0.570925 | 2.715216 |
| Au | 0.189594 | -4.56573 | -3.65657 |

|    |          |          |          |
|----|----------|----------|----------|
| Au | 3.096947 | -2.33136 | -4.07401 |
| Au | -2.77668 | 3.66456  | 2.822898 |
| S  | -2.14786 | 2.788663 | -2.64038 |
| S  | -2.32544 | -3.39927 | 1.373476 |
| S  | -3.45955 | -1.78102 | -3.39343 |
| S  | 1.992618 | -3.98479 | 0.532732 |
| S  | 3.347992 | 0.870404 | 0.681983 |
| S  | -5.24957 | 0.295144 | 0.499888 |
| S  | 2.182112 | 1.932198 | -3.60889 |
| S  | 0.823557 | 4.631698 | 0.074311 |
| S  | 0.554562 | -1.17158 | 4.089843 |
| S  | -0.90537 | -6.12934 | -2.23618 |
| S  | 5.082105 | -1.55148 | -3.01635 |
| S  | -3.73083 | 5.140415 | 1.191487 |
| S  | -2.0082  | 2.084192 | 4.415645 |
| S  | 1.214001 | -3.15287 | -5.2779  |
| C  | -4.16223 | -3.33032 | 1.299173 |
| C  | -4.03507 | -3.52938 | -3.37406 |
| C  | 0.463282 | -7.11005 | -1.48275 |
| C  | -6.31366 | 1.680984 | -0.08481 |
| C  | 3.831053 | -3.90517 | 0.486037 |
| C  | 3.997211 | 0.064663 | 2.203932 |
| C  | -0.77739 | -2.11831 | 4.938949 |
| C  | 1.085902 | 2.427079 | -5.00448 |
| C  | -3.59633 | 2.195829 | -3.60563 |
| C  | 1.911084 | -4.31408 | -6.53032 |
| C  | 5.683079 | -0.20167 | -4.12183 |
| C  | 2.310325 | 4.724607 | 1.159582 |
| C  | -2.6439  | 6.630938 | 1.215132 |
| C  | -0.60397 | 2.886275 | 5.298002 |
| H  | -4.55151 | -4.3223  | 1.567582 |
| H  | -4.51904 | -3.04149 | 0.302176 |
| H  | -4.50462 | -2.58753 | 2.032647 |
| H  | -3.79104 | -4.0258  | -2.42526 |
| H  | -3.53419 | -4.05521 | -4.19892 |
| H  | -5.12177 | -3.53985 | -3.53626 |
| H  | 0.972459 | -7.6592  | -2.28656 |
| H  | 0.012209 | -7.82318 | -0.77879 |
| H  | 1.171887 | -6.46145 | -0.95148 |
| H  | -7.18447 | 1.267934 | -0.61203 |
| H  | -5.76767 | 2.366336 | -0.7469  |
| H  | -6.65445 | 2.233501 | 0.802415 |
| H  | 4.169037 | -4.47379 | -0.39164 |

|   |          |          |          |
|---|----------|----------|----------|
| H | 4.225829 | -4.371   | 1.399603 |
| H | 4.191115 | -2.87062 | 0.403677 |
| H | 5.087059 | 0.202109 | 2.23208  |
| H | 3.748678 | -1.0042  | 2.236038 |
| H | 3.539003 | 0.563762 | 3.069031 |
| H | -0.31709 | -2.92437 | 5.527532 |
| H | -1.48398 | -2.54661 | 4.215763 |
| H | -1.30541 | -1.42696 | 5.611228 |
| H | 1.188861 | 1.674314 | -5.79836 |
| H | 1.421283 | 3.404584 | -5.37857 |
| H | 0.03903  | 2.493462 | -4.68148 |
| H | -4.30735 | 1.645001 | -2.97602 |
| H | -3.22328 | 1.526286 | -4.39303 |
| H | -4.0875  | 3.066911 | -4.06127 |
| H | 1.071187 | -4.80502 | -7.0415  |
| H | 2.55982  | -5.06962 | -6.07038 |
| H | 2.486236 | -3.72283 | -7.25656 |
| H | 5.988766 | -0.6543  | -5.07513 |
| H | 6.554082 | 0.263389 | -3.63964 |
| H | 4.902568 | 0.551482 | -4.2909  |
| H | 3.026763 | 5.41872  | 0.697943 |
| H | 2.77668  | 3.738522 | 1.28201  |
| H | 1.995717 | 5.120085 | 2.135599 |
| H | -2.98008 | 7.299709 | 0.410746 |
| H | -1.59056 | 6.363382 | 1.060321 |
| H | -2.77362 | 7.129696 | 2.185414 |
| H | 0.08835  | 3.374082 | 4.600683 |
| H | -0.07011 | 2.099774 | 5.849962 |
| H | -1.00531 | 3.626452 | 6.004339 |

7.  $\text{Au}_{16}\text{Ag}_2(\text{SCH}_3)_{14}$  : C1, C2

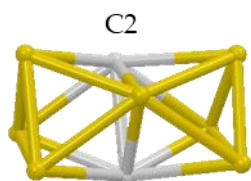

| 88 | C1       |          |          |
|----|----------|----------|----------|
| Au | -1.37698 | -1.30326 | 0.540205 |
| Au | 1.046222 | -2.47171 | -1.08332 |
| Ag | 1.019097 | 0.167443 | 0.459109 |
| Ag | -1.29148 | 0.87444  | -1.41049 |

|    |          |          |          |
|----|----------|----------|----------|
| Au | -1.62493 | -4.79173 | -0.49652 |
| Au | -1.16038 | -1.82451 | -2.56493 |
| Au | 1.15642  | -0.21926 | -2.65109 |
| Au | 1.29037  | -2.50569 | 2.3847   |
| Au | -4.37464 | -0.74161 | -1.54073 |
| Au | 4.22213  | -0.37077 | -1.14023 |
| Au | -2.95685 | 1.168105 | 0.974676 |
| Au | -0.61634 | 2.648613 | 0.882865 |
| Au | 1.517436 | 3.204897 | -1.75919 |
| Au | -3.02918 | 3.972281 | -0.77632 |
| Au | -0.84629 | 0.522431 | 2.724886 |
| Au | 0.20378  | -4.59305 | -3.68514 |
| Au | 3.094242 | -2.34229 | -4.07824 |
| Au | -2.81886 | 3.64473  | 2.855772 |
| S  | -2.22033 | 2.889482 | -2.72661 |
| S  | -2.32667 | -3.4705  | 1.332901 |
| S  | -3.45121 | -1.80639 | -3.45548 |
| S  | 1.984554 | -3.96786 | 0.635018 |
| S  | 3.444846 | 0.896908 | 0.696167 |
| S  | -5.2035  | 0.324589 | 0.422554 |
| S  | 2.153977 | 1.829803 | -3.58929 |
| S  | 0.810925 | 4.496564 | 0.11424  |
| S  | 0.564203 | -1.05182 | 4.112403 |
| S  | -0.86959 | -6.17624 | -2.27442 |
| S  | 5.074292 | -1.57219 | -3.01279 |
| S  | -3.766   | 5.100537 | 1.201411 |
| S  | -2.01761 | 2.134327 | 4.499427 |
| S  | 1.203515 | -3.14088 | -5.28318 |
| C  | -4.16121 | -3.38109 | 1.226914 |
| C  | -4.05729 | -3.5452  | -3.42021 |
| C  | 0.509887 | -7.13284 | -1.5091  |
| C  | -6.22222 | 1.75729  | -0.12437 |
| C  | 3.819781 | -3.85612 | 0.544666 |
| C  | 4.132722 | 0.097201 | 2.206079 |
| C  | -0.71374 | -2.00915 | 5.032323 |
| C  | 1.045861 | 2.331987 | -4.97358 |
| C  | -3.70193 | 2.354862 | -3.67897 |
| C  | 1.89458  | -4.27301 | -6.56553 |
| C  | 5.690239 | -0.23805 | -4.12893 |
| C  | 2.262849 | 4.559246 | 1.246667 |
| C  | -2.71211 | 6.612699 | 1.260842 |
| C  | -0.55835 | 2.952236 | 5.269846 |
| H  | -4.56897 | -4.37296 | 1.466947 |



|   |          |          |          |
|---|----------|----------|----------|
| H | -4.49628 | -3.0677  | 0.229529 |
| H | -4.508   | -2.64892 | 1.969101 |
| H | -3.84571 | -4.02947 | -2.45766 |
| H | -3.54355 | -4.09194 | -4.22321 |
| H | -5.13924 | -3.54061 | -3.61134 |
| H | 1.034938 | -7.6743  | -2.30781 |
| H | 0.065135 | -7.8526  | -0.80795 |
| H | 1.203768 | -6.47296 | -0.97251 |
| H | -7.11871 | 1.373636 | -0.6307  |
| H | -5.66244 | 2.420845 | -0.79656 |
| H | -6.5176  | 2.316658 | 0.77421  |
| H | 4.148372 | -4.44634 | -0.32212 |
| H | 4.242242 | -4.28598 | 1.463389 |
| H | 4.157231 | -2.81803 | 0.421898 |
| H | 5.226831 | 0.19626  | 2.200296 |
| H | 3.851881 | -0.96238 | 2.271778 |
| H | 3.722547 | 0.626286 | 3.077959 |
| H | -0.20779 | -2.76741 | 5.646221 |
| H | -1.41733 | -2.49695 | 4.34523  |
| H | -1.25425 | -1.30671 | 5.682493 |
| H | 1.117553 | 1.56607  | -5.75813 |
| H | 1.402275 | 3.295135 | -5.36491 |
| H | 0.006694 | 2.431859 | -4.63482 |
| H | -4.37226 | 1.72817  | -3.0751  |
| H | -3.34989 | 1.768247 | -4.53948 |
| H | -4.24043 | 3.242599 | -4.03815 |
| H | 1.052692 | -4.75889 | -7.07809 |
| H | 2.552518 | -5.03326 | -6.12687 |
| H | 2.458779 | -3.66367 | -7.28524 |
| H | 5.993957 | -0.70025 | -5.07827 |
| H | 6.564074 | 0.223177 | -3.64824 |
| H | 4.916762 | 0.520608 | -4.30518 |
| H | 2.983408 | 5.279061 | 0.833437 |
| H | 2.737459 | 3.574396 | 1.343651 |
| H | 1.91332  | 4.913938 | 2.226381 |
| H | -3.0445  | 7.284609 | 0.45748  |
| H | -1.65089 | 6.367714 | 1.123906 |
| H | -2.86792 | 7.098212 | 2.234102 |
| H | 0.124197 | 3.363623 | 4.515309 |
| H | -0.02684 | 2.191526 | 5.859524 |
| H | -0.9036  | 3.756597 | 5.934502 |

8.  $\text{Au}_{16}\text{Ag}_2(\text{SCH}_3)_{14}$  : A1, C1

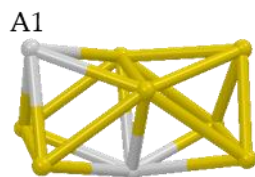

| 88 | C1       |          |          |
|----|----------|----------|----------|
| Au | -1.34484 | -1.29631 | 0.56509  |
| Au | 1.064471 | -2.42046 | -1.15035 |
| Au | 0.952119 | 0.222795 | 0.463846 |
| Ag | -1.24137 | 0.87943  | -1.41326 |
| Au | -1.64065 | -4.75688 | -0.46633 |
| Au | -1.14684 | -1.77987 | -2.63643 |
| Au | 1.169035 | -0.16951 | -2.72254 |
| Au | 1.287142 | -2.53472 | 2.355422 |
| Au | -4.36249 | -0.76611 | -1.50894 |
| Au | 4.178182 | -0.37012 | -1.16141 |
| Au | -2.90162 | 1.168279 | 0.951768 |
| Au | -0.59682 | 2.668689 | 0.872192 |
| Au | 1.541857 | 3.271669 | -1.75076 |
| Au | -2.995   | 3.935184 | -0.8305  |
| Ag | -0.79793 | 0.537756 | 2.836906 |
| Au | 0.191208 | -4.58226 | -3.67042 |
| Au | 3.090142 | -2.34126 | -4.0831  |
| Au | -2.80045 | 3.642866 | 2.794318 |
| S  | -2.19838 | 2.841724 | -2.77636 |
| S  | -2.33192 | -3.42552 | 1.363421 |
| S  | -3.46672 | -1.79395 | -3.45686 |
| S  | 1.959954 | -3.95233 | 0.556452 |
| S  | 3.340578 | 0.886839 | 0.662349 |
| S  | -5.15554 | 0.26976  | 0.488131 |
| S  | 2.179488 | 1.907105 | -3.59135 |
| S  | 0.851362 | 4.546871 | 0.145234 |
| S  | 0.61667  | -1.15898 | 4.162537 |
| S  | -0.89737 | -6.14481 | -2.24652 |
| S  | 5.068994 | -1.5577  | -3.01982 |
| S  | -3.73047 | 5.094127 | 1.127075 |
| S  | -2.05219 | 2.163339 | 4.485604 |
| S  | 1.206728 | -3.15897 | -5.28649 |
| C  | -4.16686 | -3.33972 | 1.269215 |
| C  | -4.0445  | -3.54244 | -3.42759 |
| C  | 0.47574  | -7.11335 | -1.48514 |

|   |          |          |          |
|---|----------|----------|----------|
| C | -6.20346 | 1.694634 | -0.0235  |
| C | 3.797608 | -3.87403 | 0.485213 |
| C | 4.003931 | 0.097331 | 2.186558 |
| C | -0.6689  | -2.14239 | 5.045328 |
| C | 1.103897 | 2.441839 | -4.98856 |
| C | -3.68779 | 2.280643 | -3.70054 |
| C | 1.903609 | -4.31124 | -6.54729 |
| C | 5.675793 | -0.21576 | -4.13183 |
| C | 2.308804 | 4.571588 | 1.270478 |
| C | -2.6642  | 6.598208 | 1.171875 |
| C | -0.64669 | 3.025358 | 5.309749 |
| H | -4.56864 | -4.3262  | 1.539621 |
| H | -4.51029 | -3.05568 | 0.266152 |
| H | -4.51054 | -2.58861 | 1.993474 |
| H | -3.808   | -4.03223 | -2.47364 |
| H | -3.53726 | -4.07351 | -4.2451  |
| H | -5.12977 | -3.5534  | -3.59895 |
| H | 0.991369 | -7.66199 | -2.28516 |
| H | 0.027133 | -7.82694 | -0.78013 |
| H | 1.178129 | -6.45818 | -0.95367 |
| H | -7.11156 | 1.303729 | -0.50294 |
| H | -5.67128 | 2.363407 | -0.71263 |
| H | -6.47655 | 2.250445 | 0.884322 |
| H | 4.124609 | -4.44694 | -0.39379 |
| H | 4.202974 | -4.33584 | 1.396186 |
| H | 4.15718  | -2.84    | 0.394073 |
| H | 5.09624  | 0.216323 | 2.192973 |
| H | 3.737572 | -0.96632 | 2.242805 |
| H | 3.570729 | 0.619748 | 3.050847 |
| H | -0.18057 | -2.95263 | 5.604461 |
| H | -1.39832 | -2.56871 | 4.343847 |
| H | -1.18126 | -1.47003 | 5.748391 |
| H | 1.198364 | 1.696848 | -5.79073 |
| H | 1.464976 | 3.41623  | -5.34643 |
| H | 0.056279 | 2.527557 | -4.6727  |
| H | -4.35391 | 1.673849 | -3.07241 |
| H | -3.34312 | 1.667572 | -4.54535 |
| H | -4.22745 | 3.158569 | -4.08138 |
| H | 1.063477 | -4.80105 | -7.059   |
| H | 2.555635 | -5.06785 | -6.09372 |
| H | 2.474937 | -3.71393 | -7.2715  |
| H | 5.980246 | -0.67434 | -5.08264 |
| H | 6.548342 | 0.247869 | -3.65113 |

|   |          |          |          |
|---|----------|----------|----------|
| H | 4.898268 | 0.539612 | -4.30453 |
| H | 3.046863 | 5.274292 | 0.858646 |
| H | 2.758499 | 3.574475 | 1.361471 |
| H | 1.972604 | 4.930087 | 2.253593 |
| H | -2.98852 | 7.262544 | 0.359021 |
| H | -1.60442 | 6.342943 | 1.042268 |
| H | -2.82062 | 7.097107 | 2.138193 |
| H | 0.075577 | 3.418864 | 4.582819 |
| H | -0.14408 | 2.290127 | 5.954631 |
| H | -1.03345 | 3.848239 | 5.92691  |

9.  $\text{Au}_{16}\text{Ag}_2(\text{SCH}_3)_{14}$  : A1, C2

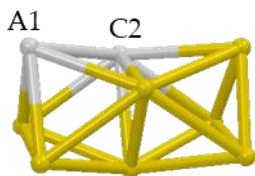

88

|    |          |          |          |
|----|----------|----------|----------|
| Au | -1.46549 | -1.24431 | 0.426311 |
| Au | 1.020684 | -2.41884 | -1.2104  |
| Ag | 0.998448 | 0.174    | 0.420481 |
| Au | -1.2637  | 0.887878 | -1.35207 |
| Au | -1.60703 | -4.7242  | -0.41279 |
| Au | -1.2017  | -1.73552 | -2.67685 |
| Au | 1.126572 | -0.12674 | -2.74154 |
| Au | 1.317837 | -2.49372 | 2.280034 |
| Au | -4.44062 | -0.7945  | -1.45904 |
| Au | 4.183426 | -0.36035 | -1.14725 |
| Au | -2.9921  | 1.224019 | 0.910656 |
| Au | -0.63768 | 2.65675  | 0.858942 |
| Au | 1.63501  | 3.251808 | -1.63752 |
| Au | -2.97961 | 3.968062 | -0.93952 |
| Ag | -0.9106  | 0.517902 | 2.805705 |
| Au | 0.127021 | -4.54302 | -3.66916 |
| Au | 3.019987 | -2.29951 | -4.09896 |
| Au | -2.90495 | 3.703676 | 2.686541 |
| S  | -2.09392 | 2.789241 | -2.80535 |
| S  | -2.21862 | -3.37539 | 1.434879 |
| S  | -3.55382 | -1.82034 | -3.41452 |
| S  | 1.955166 | -3.9326  | 0.488281 |
| S  | 3.426046 | 0.860638 | 0.729984 |
| S  | -5.24533 | 0.271249 | 0.52096  |

|   |          |          |          |
|---|----------|----------|----------|
| S | 2.250679 | 1.934304 | -3.52099 |
| S | 0.916767 | 4.487299 | 0.274684 |
| S | 0.639267 | -1.09177 | 4.063716 |
| S | -0.94239 | -6.10709 | -2.22839 |
| S | 5.011127 | -1.53452 | -3.04779 |
| S | -3.75539 | 5.162456 | 0.978061 |
| S | -2.20527 | 2.207406 | 4.386053 |
| S | 1.133376 | -3.12567 | -5.29764 |
| C | -4.05963 | -3.34903 | 1.454988 |
| C | -4.08492 | -3.58215 | -3.35553 |
| C | 0.440574 | -7.10162 | -1.52056 |
| C | -6.32044 | 1.661551 | -0.0305  |
| C | 3.790653 | -3.86442 | 0.375489 |
| C | 4.128065 | 0.015982 | 2.208057 |
| C | -0.56472 | -2.11982 | 5.009548 |
| C | 1.216559 | 2.567917 | -4.90792 |
| C | -3.5363  | 2.166386 | -3.76245 |
| C | 1.835539 | -4.28779 | -6.54696 |
| C | 5.624763 | -0.19092 | -4.15266 |
| C | 2.324138 | 4.460926 | 1.460813 |
| C | -2.64958 | 6.637791 | 1.042313 |
| C | -0.81625 | 3.061577 | 5.245705 |
| H | -4.41307 | -4.34036 | 1.771157 |
| H | -4.47304 | -3.09864 | 0.469665 |
| H | -4.38043 | -2.59181 | 2.183542 |
| H | -3.81207 | -4.056   | -2.40319 |
| H | -3.58663 | -4.10944 | -4.18093 |
| H | -5.1738  | -3.62162 | -3.49736 |
| H | 0.924684 | -7.64781 | -2.34164 |
| H | 0.004772 | -7.81741 | -0.80972 |
| H | 1.167054 | -6.46111 | -1.00382 |
| H | -7.22598 | 1.242084 | -0.49035 |
| H | -5.80475 | 2.315774 | -0.74531 |
| H | -6.59613 | 2.242435 | 0.860792 |
| H | 4.094729 | -4.43252 | -0.51466 |
| H | 4.212288 | -4.33549 | 1.274262 |
| H | 4.152582 | -2.83125 | 0.284383 |
| H | 5.220252 | 0.134501 | 2.202368 |
| H | 3.865076 | -1.04977 | 2.233097 |
| H | 3.710986 | 0.503158 | 3.100708 |
| H | -0.01782 | -2.89828 | 5.559506 |
| H | -1.29947 | -2.58919 | 4.341788 |
| H | -1.07946 | -1.46133 | 5.723869 |

|   |          |          |          |
|---|----------|----------|----------|
| H | 1.30581  | 1.860693 | -5.7443  |
| H | 1.610584 | 3.547893 | -5.21185 |
| H | 0.16574  | 2.666914 | -4.60657 |
| H | -4.25062 | 1.633866 | -3.12099 |
| H | -3.15852 | 1.47475  | -4.52835 |
| H | -4.02893 | 3.020932 | -4.24694 |
| H | 0.998058 | -4.78517 | -7.05569 |
| H | 2.489351 | -5.03764 | -6.08479 |
| H | 2.406775 | -3.6954  | -7.27531 |
| H | 5.909686 | -0.64135 | -5.11339 |
| H | 6.510774 | 0.252524 | -3.67745 |
| H | 4.857419 | 0.579417 | -4.30354 |
| H | 3.081029 | 5.173968 | 1.104767 |
| H | 2.765586 | 3.458795 | 1.532951 |
| H | 1.948176 | 4.786319 | 2.44096  |
| H | -2.92512 | 7.298584 | 0.208872 |
| H | -1.5929  | 6.352468 | 0.957718 |
| H | -2.82881 | 7.154462 | 1.995246 |
| H | -0.06117 | 3.428719 | 4.538713 |
| H | -0.35005 | 2.329965 | 5.921309 |
| H | -1.20962 | 3.901747 | 5.834657 |

10.  $\text{Au}_{16}\text{Ag}_2(\text{SCH}_3)_{14}$  : A1, A2

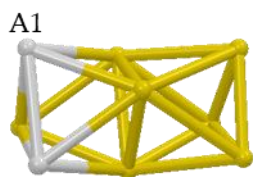

| 88 | A2       |          |          |
|----|----------|----------|----------|
| Au | -1.39928 | -1.25622 | 0.493562 |
| Au | 1.098682 | -2.40495 | -1.23553 |
| Au | 0.959481 | 0.212174 | 0.411799 |
| Au | -1.24785 | 0.895773 | -1.29503 |
| Au | -1.63613 | -4.70803 | -0.41954 |
| Au | -1.14434 | -1.7216  | -2.67774 |
| Au | 1.167725 | -0.11283 | -2.76175 |
| Au | 1.309302 | -2.57988 | 2.294065 |
| Au | -4.39584 | -0.77048 | -1.43396 |
| Au | 4.169402 | -0.3625  | -1.14355 |
| Ag | -2.98212 | 1.254211 | 0.957506 |
| Au | -0.53731 | 2.697629 | 0.886159 |
| Au | 1.572137 | 3.339503 | -1.72536 |

|    |          |          |          |
|----|----------|----------|----------|
| Au | -2.97973 | 3.945892 | -0.85474 |
| Ag | -0.76792 | 0.518925 | 2.799182 |
| Au | 0.16554  | -4.55076 | -3.65368 |
| Au | 3.07743  | -2.31728 | -4.0797  |
| Au | -2.80375 | 3.687853 | 2.724574 |
| S  | -2.13524 | 2.753448 | -2.72695 |
| S  | -2.29238 | -3.3615  | 1.416407 |
| S  | -3.4983  | -1.77878 | -3.39627 |
| S  | 1.970147 | -3.96016 | 0.464417 |
| S  | 3.329075 | 0.862696 | 0.704082 |
| S  | -5.2601  | 0.261676 | 0.53077  |
| S  | 2.205497 | 1.981072 | -3.57242 |
| S  | 0.881967 | 4.613851 | 0.17688  |
| S  | 0.629908 | -1.21799 | 4.110682 |
| S  | -0.93827 | -6.0961  | -2.2181  |
| S  | 5.057084 | -1.52565 | -3.01958 |
| S  | -3.71235 | 5.163063 | 1.06452  |
| S  | -2.08589 | 2.150451 | 4.374055 |
| S  | 1.203544 | -3.15873 | -5.28563 |
| C  | -4.1318  | -3.31881 | 1.383577 |
| C  | -4.04519 | -3.53613 | -3.36875 |
| C  | 0.426199 | -7.09585 | -1.48256 |
| C  | -6.34275 | 1.63987  | -0.03909 |
| C  | 3.80851  | -3.90467 | 0.394804 |
| C  | 3.980131 | 0.038935 | 2.214939 |
| C  | -0.6493  | -2.21212 | 4.989687 |
| C  | 1.142082 | 2.543121 | -4.96781 |
| C  | -3.59087 | 2.142659 | -3.67061 |
| C  | 1.910622 | -4.33621 | -6.517   |
| C  | 5.654638 | -0.17093 | -4.12047 |
| C  | 2.343854 | 4.629763 | 1.29723  |
| C  | -2.60096 | 6.635937 | 1.090338 |
| C  | -0.70879 | 2.996683 | 5.261548 |
| H  | -4.4992  | -4.31337 | 1.672427 |
| H  | -4.51539 | -3.04827 | 0.391583 |
| H  | -4.4688  | -2.57284 | 2.116298 |
| H  | -3.78206 | -4.02745 | -2.42246 |
| H  | -3.54643 | -4.05472 | -4.19935 |
| H  | -5.13351 | -3.56415 | -3.5175  |
| H  | 0.918944 | -7.64983 | -2.2933  |
| H  | -0.02551 | -7.80466 | -0.77464 |
| H  | 1.148734 | -6.45669 | -0.9586  |
| H  | -7.22243 | 1.219659 | -0.54554 |

|   |          |          |          |
|---|----------|----------|----------|
| H | -5.81461 | 2.323278 | -0.7172  |
| H | -6.66703 | 2.196255 | 0.851918 |
| H | 4.12777  | -4.45516 | -0.50122 |
| H | 4.208173 | -4.39864 | 1.291355 |
| H | 4.18153  | -2.87317 | 0.334485 |
| H | 5.069819 | 0.177853 | 2.240361 |
| H | 3.732574 | -1.03046 | 2.234495 |
| H | 3.524606 | 0.526713 | 3.087906 |
| H | -0.15911 | -3.03456 | 5.529214 |
| H | -1.38721 | -2.62292 | 4.28761  |
| H | -1.15122 | -1.55111 | 5.710951 |
| H | 1.247967 | 1.816753 | -5.78561 |
| H | 1.499837 | 3.527292 | -5.30145 |
| H | 0.090717 | 2.614452 | -4.66076 |
| H | -4.30694 | 1.62223  | -3.02139 |
| H | -3.22563 | 1.442232 | -4.43443 |
| H | -4.07374 | 3.002386 | -4.15569 |
| H | 1.074815 | -4.8341  | -7.02813 |
| H | 2.556039 | -5.08539 | -6.04211 |
| H | 2.491269 | -3.75436 | -7.24645 |
| H | 5.957591 | -0.61923 | -5.07668 |
| H | 6.527182 | 0.291249 | -3.63829 |
| H | 4.874027 | 0.583513 | -4.28315 |
| H | 3.088662 | 5.32085  | 0.877827 |
| H | 2.782389 | 3.628102 | 1.393567 |
| H | 2.016164 | 4.998706 | 2.279379 |
| H | -2.90657 | 7.297388 | 0.268012 |
| H | -1.54867 | 6.348628 | 0.966243 |
| H | -2.74578 | 7.152338 | 2.049257 |
| H | 0.035499 | 3.405833 | 4.566575 |
| H | -0.22787 | 2.247124 | 5.906131 |
| H | -1.11844 | 3.804602 | 5.883428 |

11.  $\text{Au}_{16}\text{Ag}_2(\text{SCH}_3)_{14}$  : A1, A3

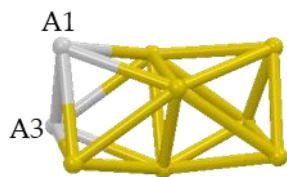

|    |          |          |          |
|----|----------|----------|----------|
| 88 |          |          |          |
| Au | -1.36705 | -1.30007 | 0.483425 |
| Au | 1.042252 | -2.4394  | -1.23327 |



|    |          |          |          |
|----|----------|----------|----------|
| Au | 0.946106 | 0.235031 | 0.453103 |
| Au | -1.22298 | 0.889653 | -1.28821 |
| Au | -1.63876 | -4.75347 | -0.45446 |
| Au | -1.19886 | -1.75175 | -2.67345 |
| Au | 1.120173 | -0.14644 | -2.76237 |
| Au | 1.308286 | -2.57378 | 2.294938 |
| Au | -4.45535 | -0.77424 | -1.45278 |
| Au | 4.135696 | -0.33489 | -1.11282 |
| Au | -2.9709  | 1.154221 | 0.951063 |
| Ag | -0.60337 | 2.735571 | 0.894385 |
| Au | 1.558615 | 3.308165 | -1.70387 |
| Au | -2.96011 | 3.932608 | -0.86683 |
| Ag | -0.85497 | 0.461371 | 2.808973 |
| Au | 0.161239 | -4.57539 | -3.67289 |
| Au | 3.055786 | -2.3128  | -4.05554 |
| Au | -2.81358 | 3.668508 | 2.725252 |
| S  | -2.08998 | 2.751817 | -2.7348  |
| S  | -2.28478 | -3.41005 | 1.385693 |
| S  | -3.55638 | -1.80404 | -3.39912 |
| S  | 1.958315 | -3.96592 | 0.470584 |
| S  | 3.300198 | 0.902581 | 0.731289 |
| S  | -5.25903 | 0.297051 | 0.527572 |
| S  | 2.193201 | 1.935807 | -3.54576 |
| S  | 0.899671 | 4.635535 | 0.161436 |
| S  | 0.638487 | -1.20276 | 4.108872 |
| S  | -0.93761 | -6.13901 | -2.25402 |
| S  | 5.023858 | -1.51302 | -2.97897 |
| S  | -3.7278  | 5.123964 | 1.053127 |
| S  | -2.07348 | 2.160557 | 4.390203 |
| S  | 1.198211 | -3.15941 | -5.2838  |
| C  | -4.12282 | -3.33209 | 1.340573 |
| C  | -4.10634 | -3.56052 | -3.35839 |
| C  | 0.432116 | -7.1298  | -1.51527 |
| C  | -6.28601 | 1.723503 | -0.02146 |
| C  | 3.795053 | -3.89247 | 0.380817 |
| C  | 3.959914 | 0.083514 | 2.241407 |
| C  | -0.60068 | -2.21781 | 5.021504 |
| C  | 1.163761 | 2.518233 | -4.95774 |
| C  | -3.53858 | 2.13438  | -3.68542 |
| C  | 1.92475  | -4.31894 | -6.52086 |
| C  | 5.630503 | -0.16694 | -4.08518 |
| C  | 2.369615 | 4.66662  | 1.272534 |
| C  | -2.67129 | 6.635378 | 1.098646 |

|   |          |          |          |
|---|----------|----------|----------|
| C | -0.66581 | 2.993646 | 5.241092 |
| H | -4.51307 | -4.31745 | 1.63103  |
| H | -4.49431 | -3.05891 | 0.344438 |
| H | -4.44994 | -2.57581 | 2.0673   |
| H | -3.8353  | -4.04906 | -2.41289 |
| H | -3.61441 | -4.08238 | -4.19103 |
| H | -5.1957  | -3.5887  | -3.49892 |
| H | 0.931378 | -7.67933 | -2.32502 |
| H | -0.01609 | -7.84268 | -0.80921 |
| H | 1.148676 | -6.48617 | -0.9886  |
| H | -7.1955  | 1.333536 | -0.49924 |
| H | -5.74301 | 2.371327 | -0.72183 |
| H | -6.55928 | 2.302248 | 0.871906 |
| H | 4.110532 | -4.43763 | -0.51976 |
| H | 4.20836  | -4.38503 | 1.271968 |
| H | 4.157771 | -2.85728 | 0.320139 |
| H | 5.048569 | 0.231197 | 2.263712 |
| H | 3.721047 | -0.98777 | 2.260697 |
| H | 3.502592 | 0.567365 | 3.115441 |
| H | -0.0811  | -3.02518 | 5.556058 |
| H | -1.34431 | -2.6501  | 4.338651 |
| H | -1.10229 | -1.56341 | 5.749012 |
| H | 1.273162 | 1.794506 | -5.77748 |
| H | 1.541655 | 3.498863 | -5.2797  |
| H | 0.108534 | 2.604285 | -4.66805 |
| H | -4.25601 | 1.610031 | -3.0408  |
| H | -3.16613 | 1.436171 | -4.44779 |
| H | -4.02323 | 2.991499 | -4.1733  |
| H | 1.09714  | -4.81826 | -7.04383 |
| H | 2.572102 | -5.0679  | -6.04826 |
| H | 2.506618 | -3.72531 | -7.23973 |
| H | 5.938088 | -0.62215 | -5.0366  |
| H | 6.501213 | 0.296577 | -3.60098 |
| H | 4.851708 | 0.587531 | -4.25653 |
| H | 3.128032 | 5.331691 | 0.836458 |
| H | 2.79384  | 3.662733 | 1.40348  |
| H | 2.050889 | 5.071269 | 2.244024 |
| H | -2.99274 | 7.290241 | 0.277131 |
| H | -1.60815 | 6.387855 | 0.982796 |
| H | -2.84393 | 7.139421 | 2.059432 |
| H | 0.074636 | 3.382381 | 4.530218 |
| H | -0.18656 | 2.243957 | 5.886852 |
| H | -1.0501  | 3.816493 | 5.859613 |

12.  $\text{Au}_{15}\text{Ag}_3(\text{SCH}_3)_{14}$  : C1, C2, C3

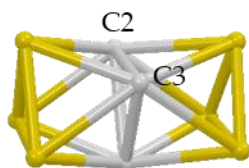

| 88 | C1       |          |          |
|----|----------|----------|----------|
| Ag | -1.41438 | -1.33251 | 0.45508  |
| Au | 1.052816 | -2.43743 | -1.09442 |
| Ag | 1.017702 | 0.18352  | 0.445031 |
| Ag | -1.23214 | 0.957117 | -1.46511 |
| Au | -1.64225 | -4.78748 | -0.43898 |
| Au | -1.14056 | -1.76697 | -2.58544 |
| Au | 1.188505 | -0.18444 | -2.65428 |
| Au | 1.269548 | -2.5136  | 2.353199 |
| Au | -4.3337  | -0.76426 | -1.51734 |
| Au | 4.239324 | -0.37846 | -1.15066 |
| Au | -2.8892  | 1.174146 | 0.939145 |
| Au | -0.58471 | 2.670707 | 0.864383 |
| Au | 1.54217  | 3.240106 | -1.76063 |
| Au | -3.03555 | 4.002349 | -0.80806 |
| Au | -0.79328 | 0.530298 | 2.681879 |
| Au | 0.196515 | -4.5789  | -3.65942 |
| Au | 3.094958 | -2.33158 | -4.08785 |
| Au | -2.8437  | 3.653516 | 2.838016 |
| S  | -2.24481 | 2.935696 | -2.77518 |
| S  | -2.36232 | -3.50153 | 1.404248 |
| S  | -3.4332  | -1.79675 | -3.45931 |
| S  | 1.965786 | -3.96962 | 0.600885 |
| S  | 3.469076 | 0.877781 | 0.694021 |
| S  | -5.13334 | 0.285156 | 0.463215 |
| S  | 2.188546 | 1.863008 | -3.58736 |
| S  | 0.838393 | 4.534199 | 0.111837 |
| S  | 0.548351 | -1.05568 | 4.077165 |
| S  | -0.88445 | -6.14765 | -2.24055 |
| S  | 5.083769 | -1.5682  | -3.03485 |
| S  | -3.76171 | 5.121046 | 1.175762 |
| S  | -2.07925 | 2.128336 | 4.482291 |
| S  | 1.191685 | -3.13431 | -5.26953 |
| C  | -4.20108 | -3.46454 | 1.308551 |
| C  | -4.00249 | -3.54798 | -3.4264  |

|   |          |          |          |
|---|----------|----------|----------|
| C | 0.485463 | -7.12982 | -1.49201 |
| C | -6.18003 | 1.707169 | -0.0601  |
| C | 3.802238 | -3.86532 | 0.518161 |
| C | 4.146839 | 0.061566 | 2.199337 |
| C | -0.7508  | -1.98761 | 4.993579 |
| C | 1.089412 | 2.363448 | -4.97955 |
| C | -3.73413 | 2.360115 | -3.6909  |
| C | 1.87194  | -4.27258 | -6.55235 |
| C | 5.697649 | -0.22758 | -4.14437 |
| C | 2.290941 | 4.579993 | 1.244953 |
| C | -2.69591 | 6.624602 | 1.240612 |
| C | -0.64283 | 2.953161 | 5.28833  |
| H | -4.59056 | -4.46668 | 1.534305 |
| H | -4.55242 | -3.1416  | 0.319807 |
| H | -4.56128 | -2.75262 | 2.064375 |
| H | -3.77602 | -4.02979 | -2.46607 |
| H | -3.48274 | -4.08164 | -4.2342  |
| H | -5.08539 | -3.56312 | -3.61129 |
| H | 0.996792 | -7.67518 | -2.29701 |
| H | 0.034247 | -7.84654 | -0.79181 |
| H | 1.19282  | -6.48379 | -0.95606 |
| H | -7.09017 | 1.31391  | -0.53346 |
| H | -5.64749 | 2.370196 | -0.75444 |
| H | -6.44882 | 2.269625 | 0.844851 |
| H | 4.1298   | -4.44685 | -0.35491 |
| H | 4.21881  | -4.30938 | 1.432815 |
| H | 4.145965 | -2.82775 | 0.409407 |
| H | 5.24184  | 0.149907 | 2.196668 |
| H | 3.85576  | -0.99573 | 2.25827  |
| H | 3.740036 | 0.589292 | 3.073605 |
| H | -0.25746 | -2.74096 | 5.623495 |
| H | -1.44977 | -2.47866 | 4.304205 |
| H | -1.29157 | -1.27007 | 5.626618 |
| H | 1.168148 | 1.598016 | -5.76386 |
| H | 1.448434 | 3.327022 | -5.36728 |
| H | 0.047439 | 2.462422 | -4.64922 |
| H | -4.37224 | 1.715797 | -3.07089 |
| H | -3.38797 | 1.783379 | -4.56044 |
| H | -4.30583 | 3.232563 | -4.03594 |
| H | 1.025405 | -4.75447 | -7.06093 |
| H | 2.526998 | -5.03582 | -6.11457 |
| H | 2.436979 | -3.66799 | -7.27535 |
| H | 5.996617 | -0.68367 | -5.0981  |

|   |          |          |          |
|---|----------|----------|----------|
| H | 6.574749 | 0.22786  | -3.66406 |
| H | 4.925628 | 0.53459  | -4.31179 |
| H | 3.017388 | 5.297247 | 0.837776 |
| H | 2.75814  | 3.591096 | 1.336977 |
| H | 1.942451 | 4.930328 | 2.226564 |
| H | -3.01763 | 7.298791 | 0.43487  |
| H | -1.63571 | 6.371462 | 1.111124 |
| H | -2.85416 | 7.112217 | 2.212449 |
| H | 0.074285 | 3.33702  | 4.551089 |
| H | -0.1427  | 2.202273 | 5.917059 |
| H | -0.99991 | 3.778438 | 5.920339 |

13.  $\text{Au}_{15}\text{Ag}_3(\text{SCH}_3)_{14}$  : A1, C1, C2

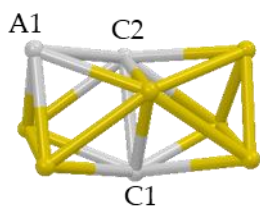

| 88 | C1       |          |          |
|----|----------|----------|----------|
| Au | -1.45228 | -1.22796 | 0.489782 |
| Au | 1.021115 | -2.43274 | -1.14093 |
| Ag | 0.997329 | 0.168224 | 0.449657 |
| Ag | -1.27414 | 0.910255 | -1.44663 |
| Au | -1.60916 | -4.74004 | -0.4545  |
| Au | -1.17964 | -1.76965 | -2.62383 |
| Au | 1.146833 | -0.17425 | -2.69892 |
| Au | 1.308888 | -2.49181 | 2.331566 |
| Au | -4.40516 | -0.7663  | -1.49811 |
| Au | 4.204039 | -0.36879 | -1.14697 |
| Au | -2.94976 | 1.205529 | 0.90594  |
| Au | -0.6141  | 2.618371 | 0.843265 |
| Au | 1.586785 | 3.223686 | -1.69796 |
| Au | -3.00809 | 3.964824 | -0.88672 |
| Ag | -0.88745 | 0.531375 | 2.818517 |
| Au | 0.176854 | -4.56868 | -3.67849 |
| Au | 3.071999 | -2.32541 | -4.09639 |
| Au | -2.86863 | 3.666525 | 2.758411 |
| S  | -2.20488 | 2.872629 | -2.83178 |
| S  | -2.26429 | -3.40378 | 1.384155 |
| S  | -3.4991  | -1.79932 | -3.43938 |
| S  | 1.956946 | -3.94615 | 0.555997 |

|   |          |          |          |
|---|----------|----------|----------|
| S | 3.431741 | 0.867403 | 0.713249 |
| S | -5.2147  | 0.293248 | 0.479164 |
| S | 2.198642 | 1.881856 | -3.56301 |
| S | 0.888775 | 4.475881 | 0.207602 |
| S | 0.634843 | -1.08199 | 4.107933 |
| S | -0.9004  | -6.13181 | -2.24596 |
| S | 5.052024 | -1.55166 | -3.03273 |
| S | -3.74316 | 5.126204 | 1.068297 |
| S | -2.15255 | 2.180312 | 4.459188 |
| S | 1.184528 | -3.14232 | -5.29591 |
| C | -4.10433 | -3.36616 | 1.355466 |
| C | -4.0641  | -3.55159 | -3.39947 |
| C | 0.478567 | -7.10672 | -1.50338 |
| C | -6.27092 | 1.70072  | -0.06446 |
| C | 3.792253 | -3.86365 | 0.443492 |
| C | 4.132124 | 0.044239 | 2.204334 |
| C | -0.59274 | -2.09024 | 5.04506  |
| C | 1.123258 | 2.453974 | -4.94585 |
| C | -3.69147 | 2.294762 | -3.75115 |
| C | 1.882597 | -4.29501 | -6.55606 |
| C | 5.667928 | -0.21108 | -4.14065 |
| C | 2.318639 | 4.478697 | 1.367636 |
| C | -2.64597 | 6.60787  | 1.126778 |
| C | -0.75361 | 3.03712  | 5.299806 |
| H | -4.47213 | -4.36248 | 1.637958 |
| H | -4.49007 | -3.08924 | 0.365804 |
| H | -4.43988 | -2.62451 | 2.093331 |
| H | -3.8217  | -4.03431 | -2.44342 |
| H | -3.55635 | -4.08392 | -4.21578 |
| H | -5.14986 | -3.57002 | -3.5668  |
| H | 0.984573 | -7.65349 | -2.31072 |
| H | 0.036059 | -7.82191 | -0.79611 |
| H | 1.188036 | -6.45513 | -0.97699 |
| H | -7.1752  | 1.296082 | -0.53972 |
| H | -5.74057 | 2.360272 | -0.76363 |
| H | -6.55068 | 2.271348 | 0.832129 |
| H | 4.101194 | -4.44352 | -0.43734 |
| H | 4.21815  | -4.31631 | 1.349634 |
| H | 4.145173 | -2.82901 | 0.335339 |
| H | 5.225099 | 0.154799 | 2.195342 |
| H | 3.861818 | -1.01906 | 2.249045 |
| H | 3.719988 | 0.550454 | 3.088713 |
| H | -0.0618  | -2.87025 | 5.60834  |

|   |          |          |          |
|---|----------|----------|----------|
| H | -1.32428 | -2.55663 | 4.371815 |
| H | -1.10969 | -1.42    | 5.746729 |
| H | 1.19701  | 1.716252 | -5.75683 |
| H | 1.502488 | 3.424452 | -5.29539 |
| H | 0.079742 | 2.558247 | -4.62204 |
| H | -4.35882 | 1.697624 | -3.11531 |
| H | -3.34435 | 1.66884  | -4.58547 |
| H | -4.23146 | 3.165801 | -4.14708 |
| H | 1.043443 | -4.78773 | -7.0665  |
| H | 2.536774 | -5.04902 | -6.10135 |
| H | 2.452496 | -3.69783 | -7.28152 |
| H | 5.967182 | -0.66672 | -5.09455 |
| H | 6.545004 | 0.243197 | -3.65916 |
| H | 4.896337 | 0.551691 | -4.30738 |
| H | 3.059465 | 5.198317 | 0.991583 |
| H | 2.77445  | 3.483083 | 1.44174  |
| H | 1.955572 | 4.808466 | 2.351177 |
| H | -2.94066 | 7.275284 | 0.305187 |
| H | -1.58942 | 6.330006 | 1.018818 |
| H | -2.80987 | 7.114057 | 2.088085 |
| H | -0.00719 | 3.403636 | 4.583138 |
| H | -0.27803 | 2.30744  | 5.971038 |
| H | -1.13943 | 3.878497 | 5.892115 |

14.  $\text{Au}_{15}\text{Ag}_3(\text{SCH}_3)_{14}$  : A1, C1, C3

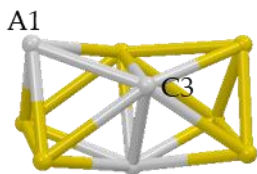

| 88 | C1       |          |          |
|----|----------|----------|----------|
| Ag | -1.38734 | -1.32997 | 0.451318 |
| Au | 1.077885 | -2.37578 | -1.16326 |
| Au | 0.929233 | 0.269013 | 0.431193 |
| Ag | -1.189   | 0.976124 | -1.46848 |
| Au | -1.64335 | -4.76922 | -0.42967 |
| Au | -1.12622 | -1.71681 | -2.65456 |
| Au | 1.200134 | -0.12693 | -2.7293  |
| Au | 1.245478 | -2.53166 | 2.316555 |
| Au | -4.31234 | -0.79722 | -1.47468 |
| Au | 4.18791  | -0.3969  | -1.15517 |
| Au | -2.83112 | 1.184225 | 0.91089  |

|    |          |          |          |
|----|----------|----------|----------|
| Au | -0.57304 | 2.718492 | 0.838713 |
| Au | 1.576638 | 3.309799 | -1.75724 |
| Au | -3.00408 | 3.98289  | -0.86871 |
| Ag | -0.75842 | 0.59267  | 2.802336 |
| Au | 0.185641 | -4.57437 | -3.66074 |
| Au | 3.084716 | -2.33689 | -4.08882 |
| Au | -2.80436 | 3.681147 | 2.77065  |
| S  | -2.23816 | 2.89298  | -2.82976 |
| S  | -2.35508 | -3.47228 | 1.410878 |
| S  | -3.44716 | -1.77887 | -3.4585  |
| S  | 1.924701 | -3.95153 | 0.523523 |
| S  | 3.360876 | 0.845396 | 0.680363 |
| S  | -5.07041 | 0.214877 | 0.54506  |
| S  | 2.208717 | 1.945519 | -3.60169 |
| S  | 0.898693 | 4.592352 | 0.13855  |
| S  | 0.593788 | -1.14142 | 4.1153   |
| S  | -0.89732 | -6.13341 | -2.23173 |
| S  | 5.069952 | -1.56761 | -3.02902 |
| S  | -3.71696 | 5.13689  | 1.098186 |
| S  | -2.07827 | 2.185655 | 4.457856 |
| S  | 1.193109 | -3.14978 | -5.28176 |
| C  | -4.19457 | -3.45504 | 1.326371 |
| C  | -3.98492 | -3.54013 | -3.44038 |
| C  | 0.476722 | -7.11261 | -1.48696 |
| C  | -6.16532 | 1.614722 | 0.060153 |
| C  | 3.764417 | -3.89121 | 0.479926 |
| C  | 3.996778 | 0.024702 | 2.198852 |
| C  | -0.70806 | -2.09085 | 5.011046 |
| C  | 1.1266   | 2.477922 | -4.99524 |
| C  | -3.74067 | 2.284532 | -3.70118 |
| C  | 1.883282 | -4.30442 | -6.54427 |
| C  | 5.676859 | -0.21587 | -4.12905 |
| C  | 2.351217 | 4.581075 | 1.271298 |
| C  | -2.6412  | 6.634257 | 1.142526 |
| C  | -0.70378 | 3.053709 | 5.32657  |
| H  | -4.56938 | -4.45459 | 1.586104 |
| H  | -4.55505 | -3.16901 | 0.329727 |
| H  | -4.55931 | -2.72346 | 2.060723 |
| H  | -3.72755 | -4.03208 | -2.49304 |
| H  | -3.47503 | -4.05216 | -4.2682  |
| H  | -5.07152 | -3.5722  | -3.60024 |
| H  | 0.98559  | -7.65888 | -2.29292 |
| H  | 0.029929 | -7.82833 | -0.78288 |



|   |          |          |          |
|---|----------|----------|----------|
| H | 1.184302 | -6.46289 | -0.95577 |
| H | -7.08    | 1.201374 | -0.38681 |
| H | -5.67115 | 2.291202 | -0.6493  |
| H | -6.41989 | 2.168871 | 0.974314 |
| H | 4.097881 | -4.46231 | -0.39785 |
| H | 4.151258 | -4.36324 | 1.393698 |
| H | 4.136356 | -2.86064 | 0.400528 |
| H | 5.090292 | 0.130754 | 2.220765 |
| H | 3.717553 | -1.03653 | 2.235522 |
| H | 3.55853  | 0.538215 | 3.065956 |
| H | -0.23176 | -2.90109 | 5.580405 |
| H | -1.44393 | -2.51443 | 4.314919 |
| H | -1.20787 | -1.39967 | 5.704599 |
| H | 1.221878 | 1.73458  | -5.79878 |
| H | 1.483423 | 3.454027 | -5.35246 |
| H | 0.079163 | 2.55953  | -4.67762 |
| H | -4.37162 | 1.668227 | -3.04668 |
| H | -3.4074  | 1.671355 | -4.55042 |
| H | -4.31451 | 3.14426  | -4.0734  |
| H | 1.04056  | -4.79511 | -7.05082 |
| H | 2.536883 | -5.06035 | -6.09189 |
| H | 2.451548 | -3.70882 | -7.27222 |
| H | 5.97861  | -0.66539 | -5.085   |
| H | 6.551264 | 0.241131 | -3.64544 |
| H | 4.900694 | 0.542882 | -4.29278 |
| H | 3.108069 | 5.267241 | 0.8659   |
| H | 2.777221 | 3.573785 | 1.364461 |
| H | 2.017153 | 4.945291 | 2.253042 |
| H | -2.96102 | 7.300092 | 0.329134 |
| H | -1.58269 | 6.372896 | 1.014633 |
| H | -2.79575 | 7.134181 | 2.108665 |
| H | 0.042358 | 3.447036 | 4.623915 |
| H | -0.22122 | 2.32201  | 5.990656 |
| H | -1.1114  | 3.877456 | 5.928933 |

15.  $\text{Au}_{15}\text{Ag}_3(\text{SCH}_3)_{14}$  : A1, A2, C1

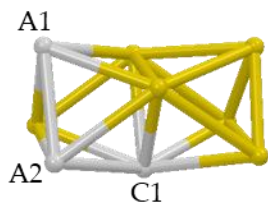

| 88 | A1       | A2       | C1       |
|----|----------|----------|----------|
| Au | -1.3545  | -1.26483 | 0.584433 |
| Au | 1.094786 | -2.41587 | -1.17702 |
| Au | 0.959897 | 0.197683 | 0.466718 |
| Ag | -1.23097 | 0.873506 | -1.37838 |
| Au | -1.66613 | -4.71802 | -0.44577 |
| Au | -1.12264 | -1.76448 | -2.64697 |
| Au | 1.186707 | -0.15762 | -2.73434 |
| Au | 1.316885 | -2.56179 | 2.34409  |
| Au | -4.35774 | -0.73073 | -1.50228 |
| Au | 4.185965 | -0.3464  | -1.16758 |
| Ag | -2.93847 | 1.208775 | 0.960153 |
| Au | -0.52506 | 2.641372 | 0.896423 |
| Au | 1.500567 | 3.308149 | -1.78357 |
| Au | -2.98742 | 3.920741 | -0.78751 |
| Ag | -0.75343 | 0.517799 | 2.83471  |
| Au | 0.20167  | -4.59171 | -3.64456 |
| Au | 3.117544 | -2.35051 | -4.07709 |
| Au | -2.77444 | 3.61619  | 2.813492 |
| S  | -2.19771 | 2.828747 | -2.73269 |
| S  | -2.37128 | -3.37929 | 1.374724 |
| S  | -3.44279 | -1.75104 | -3.44918 |
| S  | 1.981924 | -3.95602 | 0.52636  |
| S  | 3.337566 | 0.902593 | 0.657302 |
| S  | -5.22959 | 0.285988 | 0.463827 |
| S  | 2.158393 | 1.934767 | -3.60935 |
| S  | 0.810537 | 4.592388 | 0.108839 |
| S  | 0.644106 | -1.20993 | 4.168356 |
| S  | -0.92191 | -6.12237 | -2.21222 |
| S  | 5.087183 | -1.53044 | -3.02341 |
| S  | -3.70316 | 5.090929 | 1.169683 |
| S  | -2.04938 | 2.091972 | 4.471321 |
| S  | 1.249471 | -3.20902 | -5.27596 |
| C  | -4.20552 | -3.29917 | 1.267994 |
| C  | -4.0372  | -3.49396 | -3.44011 |
| C  | 0.430202 | -7.10655 | -1.43365 |
| C  | -6.27688 | 1.697238 | -0.08917 |
| C  | 3.819588 | -3.88057 | 0.450888 |

|   |          |          |          |
|---|----------|----------|----------|
| C | 4.014432 | 0.120956 | 2.179907 |
| C | -0.64128 | -2.20459 | 5.038429 |
| C | 1.070748 | 2.436718 | -5.00934 |
| C | -3.68491 | 2.281995 | -3.66883 |
| C | 1.965299 | -4.39258 | -6.49635 |
| C | 5.673965 | -0.18661 | -4.14369 |
| C | 2.296723 | 4.661285 | 1.195606 |
| C | -2.61039 | 6.576882 | 1.204988 |
| C | -0.66694 | 2.937434 | 5.350832 |
| H | -4.60409 | -4.29204 | 1.518901 |
| H | -4.54232 | -2.99917 | 0.267461 |
| H | -4.55801 | -2.56248 | 2.002769 |
| H | -3.8071  | -3.99633 | -2.49114 |
| H | -3.53496 | -4.02162 | -4.26286 |
| H | -5.12242 | -3.49189 | -3.61223 |
| H | 0.940037 | -7.67192 | -2.22572 |
| H | -0.03391 | -7.80538 | -0.72388 |
| H | 1.141269 | -6.45792 | -0.90567 |
| H | -7.15752 | 1.305356 | -0.61618 |
| H | -5.72505 | 2.384822 | -0.74392 |
| H | -6.60195 | 2.239647 | 0.810048 |
| H | 4.142544 | -4.4402  | -0.43812 |
| H | 4.227144 | -4.35719 | 1.353172 |
| H | 4.18071  | -2.84588 | 0.374776 |
| H | 5.103895 | 0.263618 | 2.189192 |
| H | 3.771206 | -0.94842 | 2.23089  |
| H | 3.568228 | 0.629905 | 3.045612 |
| H | -0.15468 | -3.02569 | 5.583141 |
| H | -1.37491 | -2.61652 | 4.332635 |
| H | -1.14921 | -1.54234 | 5.754286 |
| H | 1.17826  | 1.687006 | -5.80541 |
| H | 1.411484 | 3.415031 | -5.37623 |
| H | 0.022101 | 2.504074 | -4.69246 |
| H | -4.37009 | 1.696171 | -3.04158 |
| H | -3.33991 | 1.650751 | -4.49984 |
| H | -4.20189 | 3.165347 | -4.06817 |
| H | 1.133254 | -4.89647 | -7.00759 |
| H | 2.610991 | -5.13647 | -6.01364 |
| H | 2.547263 | -3.814   | -7.22736 |
| H | 5.982261 | -0.64623 | -5.09278 |
| H | 6.541521 | 0.290785 | -3.66744 |
| H | 4.886764 | 0.558041 | -4.31897 |
| H | 3.012691 | 5.36757  | 0.752019 |

|   |          |          |          |
|---|----------|----------|----------|
| H | 2.764767 | 3.673125 | 1.293649 |
| H | 1.980794 | 5.032303 | 2.18079  |
| H | -2.93848 | 7.250371 | 0.40124  |
| H | -1.55751 | 6.304676 | 1.054734 |
| H | -2.74292 | 7.072929 | 2.176294 |
| H | 0.066907 | 3.358694 | 4.651851 |
| H | -0.17325 | 2.184628 | 5.981942 |
| H | -1.07366 | 3.736655 | 5.98576  |

16.  $\text{Au}_{15}\text{Ag}_3(\text{SCH}_3)_{14}$  : A1, A3, C1

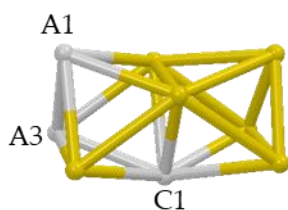

| 88 | C1       |          |          |
|----|----------|----------|----------|
| Au | -1.33942 | -1.34184 | 0.597061 |
| Au | 1.022685 | -2.46015 | -1.16797 |
| Au | 0.908932 | 0.217934 | 0.499827 |
| Ag | -1.2601  | 0.830078 | -1.37299 |
| Au | -1.66673 | -4.78721 | -0.48768 |
| Au | -1.17926 | -1.80767 | -2.65454 |
| Au | 1.130851 | -0.19677 | -2.72068 |
| Au | 1.310938 | -2.55275 | 2.35285  |
| Au | -4.40131 | -0.74087 | -1.53979 |
| Au | 4.128345 | -0.32186 | -1.13899 |
| Au | -2.91207 | 1.091957 | 0.976478 |
| Ag | -0.59825 | 2.694727 | 0.891603 |
| Au | 1.495922 | 3.281641 | -1.73429 |
| Au | -2.95733 | 3.908624 | -0.80815 |
| Ag | -0.83084 | 0.468989 | 2.848391 |
| Au | 0.197438 | -4.61774 | -3.67452 |
| Au | 3.09256  | -2.34983 | -4.05401 |
| Au | -2.77537 | 3.604583 | 2.807583 |
| S  | -2.15531 | 2.812816 | -2.74552 |
| S  | -2.37061 | -3.46692 | 1.345541 |
| S  | -3.50065 | -1.79768 | -3.46989 |
| S  | 1.954655 | -3.96641 | 0.542472 |
| S  | 3.270159 | 0.948409 | 0.668855 |
| S  | -5.20855 | 0.317891 | 0.440384 |
| S  | 2.138585 | 1.889012 | -3.55648 |
| S  | 0.845645 | 4.624524 | 0.121072 |

|   |          |          |          |
|---|----------|----------|----------|
| S | 0.671842 | -1.1752  | 4.170976 |
| S | -0.91122 | -6.17677 | -2.26186 |
| S | 5.046542 | -1.52571 | -2.9736  |
| S | -3.70378 | 5.058988 | 1.147408 |
| S | -2.03091 | 2.114506 | 4.486896 |
| S | 1.238006 | -3.20035 | -5.27966 |
| C | -4.20122 | -3.34335 | 1.215398 |
| C | -4.09946 | -3.53888 | -3.42523 |
| C | 0.452783 | -7.14651 | -1.48505 |
| C | -6.19265 | 1.779414 | -0.09172 |
| C | 3.789746 | -3.87017 | 0.437198 |
| C | 3.958568 | 0.188251 | 2.197652 |
| C | -0.56663 | -2.17769 | 5.098989 |
| C | 1.085523 | 2.420211 | -4.97127 |
| C | -3.64371 | 2.281392 | -3.68927 |
| C | 1.965136 | -4.35826 | -6.51774 |
| C | 5.648328 | -0.19019 | -4.09579 |
| C | 2.333056 | 4.686085 | 1.207621 |
| C | -2.66315 | 6.580586 | 1.201216 |
| C | -0.6087  | 2.950314 | 5.310035 |
| H | -4.62855 | -4.3282  | 1.44994  |
| H | -4.51758 | -3.02508 | 0.213489 |
| H | -4.54554 | -2.60579 | 1.953304 |
| H | -3.86143 | -4.02579 | -2.47018 |
| H | -3.60413 | -4.08078 | -4.24291 |
| H | -5.18593 | -3.53833 | -3.58887 |
| H | 0.974164 | -7.69889 | -2.27879 |
| H | -0.00337 | -7.85684 | -0.78155 |
| H | 1.152444 | -6.49143 | -0.94986 |
| H | -7.09902 | 1.422209 | -0.60005 |
| H | -5.61841 | 2.433416 | -0.76109 |
| H | -6.47344 | 2.339581 | 0.811063 |
| H | 4.105473 | -4.42791 | -0.45557 |
| H | 4.216581 | -4.33976 | 1.334269 |
| H | 4.13711  | -2.8313  | 0.353849 |
| H | 5.045393 | 0.350024 | 2.204116 |
| H | 3.734548 | -0.88496 | 2.254938 |
| H | 3.504556 | 0.694915 | 3.060544 |
| H | -0.04843 | -2.98523 | 5.63462  |
| H | -1.31958 | -2.60901 | 4.425979 |
| H | -1.05855 | -1.51496 | 5.82555  |
| H | 1.190365 | 1.673456 | -5.77047 |
| H | 1.452581 | 3.393577 | -5.32585 |

|   |          |          |          |
|---|----------|----------|----------|
| H | 0.033751 | 2.508132 | -4.67024 |
| H | -4.33582 | 1.697076 | -3.0681  |
| H | -3.29938 | 1.651609 | -4.52175 |
| H | -4.15347 | 3.169321 | -4.08767 |
| H | 1.137566 | -4.85844 | -7.03988 |
| H | 2.613925 | -5.10644 | -6.04591 |
| H | 2.545456 | -3.76366 | -7.23704 |
| H | 5.965693 | -0.65623 | -5.03868 |
| H | 6.511621 | 0.288713 | -3.61331 |
| H | 4.863819 | 0.554415 | -4.28315 |
| H | 3.070096 | 5.366318 | 0.758564 |
| H | 2.77999  | 3.691135 | 1.330958 |
| H | 2.022699 | 5.084179 | 2.184475 |
| H | -3.00672 | 7.245857 | 0.397122 |
| H | -1.60012 | 6.345788 | 1.060097 |
| H | -2.82229 | 7.066642 | 2.173509 |
| H | 0.118912 | 3.335585 | 4.584148 |
| H | -0.11761 | 2.203844 | 5.950574 |
| H | -0.98169 | 3.776479 | 5.931006 |

17.  $\text{Au}_{14}\text{Ag}_4(\text{SCH}_3)_{14}$  : A1, C1, C2, C3

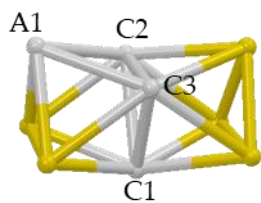

| 88 | C1       |          |          |
|----|----------|----------|----------|
| Ag | -1.47093 | -1.29382 | 0.399845 |
| Au | 1.035044 | -2.39594 | -1.14893 |
| Ag | 0.976393 | 0.193594 | 0.443838 |
| Ag | -1.21882 | 0.977245 | -1.49374 |
| Au | -1.63359 | -4.75644 | -0.42168 |
| Au | -1.15307 | -1.72275 | -2.64657 |
| Au | 1.180621 | -0.14166 | -2.70404 |
| Au | 1.267812 | -2.49089 | 2.302788 |
| Au | -4.34489 | -0.79551 | -1.47884 |
| Au | 4.205822 | -0.38188 | -1.14114 |
| Au | -2.86611 | 1.193762 | 0.881425 |
| Au | -0.5783  | 2.652759 | 0.817755 |
| Au | 1.608101 | 3.260725 | -1.71906 |
| Au | -3.0097  | 3.998628 | -0.90684 |
| Ag | -0.83593 | 0.578626 | 2.795097 |

|    |          |          |          |
|----|----------|----------|----------|
| Au | 0.171742 | -4.56309 | -3.66682 |
| Au | 3.068702 | -2.32353 | -4.09561 |
| Au | -2.86266 | 3.691587 | 2.749853 |
| S  | -2.23523 | 2.910184 | -2.8662  |
| S  | -2.32089 | -3.46022 | 1.428441 |
| S  | -3.46959 | -1.78362 | -3.4566  |
| S  | 1.928344 | -3.94602 | 0.533207 |
| S  | 3.438991 | 0.848187 | 0.72378  |
| S  | -5.11833 | 0.22817  | 0.528358 |
| S  | 2.219667 | 1.911454 | -3.58042 |
| S  | 0.921321 | 4.521031 | 0.184355 |
| S  | 0.611755 | -1.07973 | 4.080864 |
| S  | -0.90659 | -6.12056 | -2.23224 |
| S  | 5.0515   | -1.55701 | -3.03387 |
| S  | -3.72694 | 5.152616 | 1.05683  |
| S  | -2.16119 | 2.195101 | 4.447665 |
| S  | 1.174785 | -3.13533 | -5.28735 |
| C  | -4.16262 | -3.46758 | 1.390511 |
| C  | -4.00572 | -3.54529 | -3.43538 |
| C  | 0.469595 | -7.10608 | -1.49983 |
| C  | -6.21161 | 1.623435 | 0.026112 |
| C  | 3.765948 | -3.8716  | 0.449563 |
| C  | 4.127895 | 0.012441 | 2.212847 |
| C  | -0.64518 | -2.05631 | 5.012721 |
| C  | 1.138485 | 2.47061  | -4.96437 |
| C  | -3.73441 | 2.302827 | -3.74497 |
| C  | 1.865904 | -4.28814 | -6.55122 |
| C  | 5.66715  | -0.21257 | -4.1373  |
| C  | 2.356719 | 4.511531 | 1.338319 |
| C  | -2.62802 | 6.632961 | 1.115128 |
| C  | -0.79349 | 3.063247 | 5.326994 |
| H  | -4.51863 | -4.47199 | 1.657567 |
| H  | -4.55219 | -3.18371 | 0.404318 |
| H  | -4.51716 | -2.74195 | 2.135832 |
| H  | -3.75024 | -4.03479 | -2.48629 |
| H  | -3.49466 | -4.05911 | -4.26134 |
| H  | -5.09205 | -3.57735 | -3.59665 |
| H  | 0.970903 | -7.65195 | -2.31077 |
| H  | 0.025237 | -7.82207 | -0.79454 |
| H  | 1.183476 | -6.46063 | -0.9718  |
| H  | -7.12443 | 1.208436 | -0.42299 |
| H  | -5.71318 | 2.29539  | -0.68453 |
| H  | -6.47082 | 2.183395 | 0.935504 |

|   |          |          |          |
|---|----------|----------|----------|
| H | 4.085206 | -4.44963 | -0.42884 |
| H | 4.174936 | -4.33043 | 1.36033  |
| H | 4.125898 | -2.83846 | 0.351355 |
| H | 5.222173 | 0.109647 | 2.206739 |
| H | 3.844719 | -1.04769 | 2.255043 |
| H | 3.720285 | 0.521319 | 3.097759 |
| H | -0.13406 | -2.84278 | 5.585139 |
| H | -1.37934 | -2.512   | 4.335388 |
| H | -1.15366 | -1.36995 | 5.704733 |
| H | 1.215638 | 1.729824 | -5.77217 |
| H | 1.51268  | 3.441465 | -5.31816 |
| H | 0.094491 | 2.571188 | -4.64082 |
| H | -4.37287 | 1.693855 | -3.09092 |
| H | -3.39804 | 1.682836 | -4.58803 |
| H | -4.30195 | 3.162617 | -4.1269  |
| H | 1.02421  | -4.78022 | -7.05802 |
| H | 2.521621 | -5.04275 | -6.09966 |
| H | 2.432542 | -3.6908  | -7.27896 |
| H | 5.964635 | -0.66509 | -5.09319 |
| H | 6.545461 | 0.238418 | -3.65501 |
| H | 4.896522 | 0.552003 | -4.30035 |
| H | 3.105687 | 5.219834 | 0.957188 |
| H | 2.800163 | 3.510616 | 1.416938 |
| H | 2.000786 | 4.850308 | 2.321475 |
| H | -2.92325 | 7.302005 | 0.295078 |
| H | -1.57167 | 6.354819 | 1.006121 |
| H | -2.79044 | 7.137934 | 2.077353 |
| H | -0.03024 | 3.437195 | 4.631997 |
| H | -0.33023 | 2.337647 | 6.01134  |
| H | -1.20194 | 3.900823 | 5.909495 |

18.  $\text{Au}_{14}\text{Ag}_4(\text{SCH}_3)_{14}$  : A1, A2, A3, C1

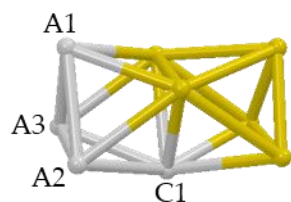

|    |          |          |          |
|----|----------|----------|----------|
| 88 |          |          |          |
| Au | -1.36651 | -1.29473 | 0.601804 |
| Au | 1.056636 | -2.44478 | -1.19729 |
| Au | 0.908143 | 0.208735 | 0.490197 |
| Ag | -1.25291 | 0.832383 | -1.35289 |



|    |          |          |          |
|----|----------|----------|----------|
| Au | -1.68725 | -4.73964 | -0.46587 |
| Au | -1.15435 | -1.78951 | -2.66872 |
| Au | 1.147114 | -0.17848 | -2.74161 |
| Au | 1.334408 | -2.57943 | 2.338733 |
| Au | -4.39293 | -0.72522 | -1.51788 |
| Au | 4.135076 | -0.30506 | -1.1442  |
| Ag | -2.94426 | 1.159725 | 0.973003 |
| Ag | -0.53077 | 2.687399 | 0.89808  |
| Au | 1.48656  | 3.316417 | -1.75952 |
| Au | -2.94807 | 3.896262 | -0.77708 |
| Ag | -0.78606 | 0.458681 | 2.849005 |
| Au | 0.2056   | -4.61897 | -3.65544 |
| Au | 3.119548 | -2.35396 | -4.05164 |
| Au | -2.74718 | 3.599771 | 2.810878 |
| S  | -2.16183 | 2.802178 | -2.71802 |
| S  | -2.39788 | -3.41314 | 1.362084 |
| S  | -3.48183 | -1.7675  | -3.45484 |
| S  | 1.973157 | -3.96529 | 0.507193 |
| S  | 3.26565  | 0.954363 | 0.666246 |
| S  | -5.26683 | 0.312679 | 0.437546 |
| S  | 2.132471 | 1.919336 | -3.57544 |
| S  | 0.844493 | 4.665842 | 0.095944 |
| S  | 0.687722 | -1.23098 | 4.17522  |
| S  | -0.93909 | -6.1433  | -2.23205 |
| S  | 5.065663 | -1.49938 | -2.97912 |
| S  | -3.67706 | 5.06998  | 1.170485 |
| S  | -2.02634 | 2.071103 | 4.461544 |
| S  | 1.278656 | -3.24011 | -5.27303 |
| C  | -4.23057 | -3.31534 | 1.240319 |
| C  | -4.08688 | -3.50682 | -3.42893 |
| C  | 0.402727 | -7.13445 | -1.4441  |
| C  | -6.28041 | 1.742631 | -0.12886 |
| C  | 3.80924  | -3.8809  | 0.405868 |
| C  | 3.954963 | 0.195635 | 2.195297 |
| C  | -0.5621  | -2.244   | 5.076296 |
| C  | 1.073139 | 2.43872  | -4.98994 |
| C  | -3.65525 | 2.278475 | -3.65818 |
| C  | 2.023898 | -4.42462 | -6.47439 |
| C  | 5.649643 | -0.16022 | -4.10641 |
| C  | 2.351644 | 4.750528 | 1.154757 |
| C  | -2.61149 | 6.57543  | 1.209127 |
| C  | -0.62682 | 2.892416 | 5.33773  |
| H  | -4.64097 | -4.30883 | 1.468505 |

|   |          |          |          |
|---|----------|----------|----------|
| H | -4.5558  | -2.993   | 0.242722 |
| H | -4.58349 | -2.58988 | 1.986095 |
| H | -3.85128 | -4.00452 | -2.47876 |
| H | -3.59455 | -4.04273 | -4.25233 |
| H | -5.17343 | -3.49977 | -3.59207 |
| H | 0.913571 | -7.70416 | -2.23245 |
| H | -0.06939 | -7.82934 | -0.73573 |
| H | 1.11506  | -6.48934 | -0.91344 |
| H | -7.15983 | 1.36765  | -0.6701  |
| H | -5.70697 | 2.421436 | -0.77416 |
| H | -6.60996 | 2.289994 | 0.765685 |
| H | 4.121926 | -4.42738 | -0.49486 |
| H | 4.231707 | -4.3672  | 1.296124 |
| H | 4.164505 | -2.84356 | 0.338905 |
| H | 5.041106 | 0.361361 | 2.203801 |
| H | 3.734715 | -0.87837 | 2.251794 |
| H | 3.497835 | 0.699848 | 3.058016 |
| H | -0.05285 | -3.06648 | 5.597685 |
| H | -1.31542 | -2.65551 | 4.391219 |
| H | -1.05251 | -1.59343 | 5.814943 |
| H | 1.187722 | 1.694006 | -5.78973 |
| H | 1.427184 | 3.417151 | -5.34381 |
| H | 0.020013 | 2.512154 | -4.68977 |
| H | -4.34896 | 1.699172 | -3.03438 |
| H | -3.31481 | 1.645025 | -4.48934 |
| H | -4.15919 | 3.169495 | -4.05704 |
| H | 1.204695 | -4.93799 | -6.99695 |
| H | 2.66695  | -5.16081 | -5.9765  |
| H | 2.613835 | -3.84562 | -7.19865 |
| H | 5.972053 | -0.62566 | -5.04795 |
| H | 6.507471 | 0.331083 | -3.62662 |
| H | 4.856087 | 0.574166 | -4.296   |
| H | 3.075995 | 5.429671 | 0.683771 |
| H | 2.807118 | 3.759827 | 1.283037 |
| H | 2.056489 | 5.159168 | 2.132039 |
| H | -2.9585  | 7.245646 | 0.41074  |
| H | -1.55452 | 6.324757 | 1.050705 |
| H | -2.74859 | 7.063448 | 2.183772 |
| H | 0.111518 | 3.305912 | 4.638879 |
| H | -0.14307 | 2.128625 | 5.963102 |
| H | -1.02027 | 3.694494 | 5.97724  |

19. Au<sub>14</sub>Ag<sub>4</sub>(SCH<sub>3</sub>)<sub>14</sub> : A1, A2, C1, C2

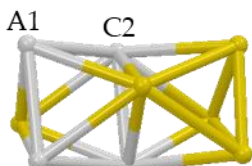

| 88 | A2       | C1       |          |
|----|----------|----------|----------|
| Au | -1.46085 | -1.17759 | 0.520147 |
| Au | 1.057376 | -2.43566 | -1.16004 |
| Ag | 1.014803 | 0.130565 | 0.45204  |
| Ag | -1.2696  | 0.902893 | -1.4117  |
| Au | -1.62765 | -4.69083 | -0.43866 |
| Au | -1.15464 | -1.76298 | -2.61693 |
| Au | 1.164026 | -0.16909 | -2.70503 |
| Au | 1.333929 | -2.52269 | 2.328313 |
| Au | -4.39956 | -0.73514 | -1.48127 |
| Au | 4.212198 | -0.34782 | -1.14562 |
| Ag | -3.00924 | 1.253807 | 0.918084 |
| Au | -0.55652 | 2.563121 | 0.8583   |
| Au | 1.541772 | 3.253752 | -1.72624 |
| Au | -3.00052 | 3.949811 | -0.85225 |
| Ag | -0.85942 | 0.503086 | 2.816368 |
| Au | 0.189073 | -4.56722 | -3.66002 |
| Au | 3.098934 | -2.32695 | -4.09143 |
| Au | -2.83316 | 3.650054 | 2.770983 |
| S  | -2.21114 | 2.854232 | -2.79698 |
| S  | -2.29721 | -3.35326 | 1.395161 |
| S  | -3.47399 | -1.76495 | -3.41811 |
| S  | 1.987229 | -3.95294 | 0.536452 |
| S  | 3.430393 | 0.881272 | 0.716495 |
| S  | -5.2986  | 0.306266 | 0.45911  |
| S  | 2.177707 | 1.903741 | -3.57604 |
| S  | 0.842014 | 4.506071 | 0.180546 |
| S  | 0.645975 | -1.1397  | 4.12104  |
| S  | -0.91992 | -6.09949 | -2.21795 |
| S  | 5.069956 | -1.52468 | -3.03104 |
| S  | -3.70913 | 5.128294 | 1.101594 |
| S  | -2.13351 | 2.127772 | 4.443179 |
| S  | 1.22137  | -3.17046 | -5.28813 |
| C  | -4.13685 | -3.32517 | 1.361831 |
| C  | -4.0554  | -3.51213 | -3.39551 |
| C  | 0.43856  | -7.09212 | -1.4616  |

|   |          |          |          |
|---|----------|----------|----------|
| C | -6.35324 | 1.695495 | -0.13591 |
| C | 3.822649 | -3.86566 | 0.427153 |
| C | 4.140825 | 0.064268 | 2.206377 |
| C | -0.58721 | -2.16191 | 5.034867 |
| C | 1.095477 | 2.441582 | -4.96717 |
| C | -3.6994  | 2.289955 | -3.72182 |
| C | 1.927887 | -4.34201 | -6.52545 |
| C | 5.670141 | -0.17983 | -4.14231 |
| C | 2.300012 | 4.54736  | 1.305432 |
| C | -2.58356 | 6.589684 | 1.145683 |
| C | -0.74004 | 2.965889 | 5.31243  |
| H | -4.49968 | -4.32857 | 1.624724 |
| H | -4.52161 | -3.03098 | 0.376895 |
| H | -4.47854 | -2.60009 | 2.11327  |
| H | -3.82585 | -4.00345 | -2.44064 |
| H | -3.54598 | -4.04419 | -4.21097 |
| H | -5.1399  | -3.51918 | -3.57193 |
| H | 0.937354 | -7.6542  | -2.26295 |
| H | -0.01911 | -7.79372 | -0.75037 |
| H | 1.157796 | -6.44892 | -0.93805 |
| H | -7.225   | 1.28499  | -0.66351 |
| H | -5.80056 | 2.373765 | -0.79938 |
| H | -6.69212 | 2.253952 | 0.748309 |
| H | 4.134039 | -4.4367  | -0.45859 |
| H | 4.248631 | -4.32539 | 1.329671 |
| H | 4.173161 | -2.82923 | 0.32883  |
| H | 5.232391 | 0.187916 | 2.197468 |
| H | 3.883251 | -1.00224 | 2.249294 |
| H | 3.72284  | 0.56423  | 3.091567 |
| H | -0.06167 | -2.95603 | 5.583201 |
| H | -1.32026 | -2.61053 | 4.351171 |
| H | -1.10223 | -1.50414 | 5.749769 |
| H | 1.184637 | 1.696436 | -5.76977 |
| H | 1.456983 | 3.415146 | -5.32683 |
| H | 0.049387 | 2.529629 | -4.64685 |
| H | -4.37504 | 1.700118 | -3.0881  |
| H | -3.35395 | 1.659441 | -4.55325 |
| H | -4.228   | 3.166271 | -4.12131 |
| H | 1.09248  | -4.84023 | -7.03686 |
| H | 2.576542 | -5.09103 | -6.05477 |
| H | 2.505357 | -3.75543 | -7.25353 |
| H | 5.973984 | -0.63455 | -5.09521 |
| H | 6.542417 | 0.285289 | -3.66243 |

|   |          |          |          |
|---|----------|----------|----------|
| H | 4.890471 | 0.574226 | -4.31097 |
| H | 3.019899 | 5.273943 | 0.902968 |
| H | 2.773934 | 3.56018  | 1.381064 |
| H | 1.956081 | 4.883069 | 2.293828 |
| H | -2.88057 | 7.263959 | 0.330641 |
| H | -1.5343  | 6.292654 | 1.01876  |
| H | -2.72327 | 7.096479 | 2.11045  |
| H | 0.011425 | 3.348037 | 4.609542 |
| H | -0.27057 | 2.220615 | 5.970407 |
| H | -1.13212 | 3.793148 | 5.920107 |

20.  $\text{Au}_{14}\text{Ag}_4(\text{SCH}_3)_{14}$  : A1, A2, A3, C2

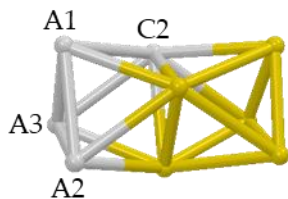

| 88 | A2       |          |          |
|----|----------|----------|----------|
| Au | -1.5214  | -1.23916 | 0.45885  |
| Au | 1.029387 | -2.458   | -1.24521 |
| Ag | 0.961433 | 0.103028 | 0.419264 |
| Au | -1.29103 | 0.89697  | -1.24808 |
| Au | -1.63797 | -4.71797 | -0.41677 |
| Au | -1.20234 | -1.73502 | -2.66445 |
| Au | 1.10908  | -0.14207 | -2.73477 |
| Au | 1.349856 | -2.55054 | 2.258336 |
| Au | -4.48038 | -0.75806 | -1.44107 |
| Au | 4.146208 | -0.31683 | -1.11142 |
| Ag | -3.0828  | 1.236256 | 0.931573 |
| Ag | -0.58333 | 2.678465 | 0.884807 |
| Au | 1.571312 | 3.297384 | -1.64692 |
| Au | -2.94206 | 3.96981  | -0.88079 |
| Ag | -0.90495 | 0.431157 | 2.763397 |
| Au | 0.15752  | -4.57571 | -3.65738 |
| Au | 3.064185 | -2.31689 | -4.06211 |
| Au | -2.82719 | 3.694846 | 2.689591 |
| S  | -2.06349 | 2.783172 | -2.73659 |
| S  | -2.2814  | -3.38211 | 1.431921 |
| S  | -3.55457 | -1.78099 | -3.38153 |
| S  | 1.976723 | -3.96995 | 0.451271 |
| S  | 3.338904 | 0.904656 | 0.749703 |
| S  | -5.39005 | 0.297341 | 0.492051 |

|   |          |          |          |
|---|----------|----------|----------|
| S | 2.196317 | 1.936507 | -3.49827 |
| S | 0.912849 | 4.611043 | 0.228261 |
| S | 0.676274 | -1.16194 | 4.05575  |
| S | -0.95753 | -6.11127 | -2.21953 |
| S | 5.02285  | -1.4937  | -2.98909 |
| S | -3.70869 | 5.177904 | 1.028866 |
| S | -2.11812 | 2.14206  | 4.324899 |
| S | 1.205919 | -3.18076 | -5.27852 |
| C | -4.12273 | -3.37184 | 1.434347 |
| C | -4.09651 | -3.54006 | -3.34185 |
| C | 0.39966  | -7.12201 | -1.48552 |
| C | -6.4512  | 1.673569 | -0.12224 |
| C | 3.811174 | -3.88618 | 0.327519 |
| C | 4.0574   | 0.090393 | 2.237206 |
| C | -0.51726 | -2.20281 | 5.001179 |
| C | 1.177582 | 2.54051  | -4.90872 |
| C | -3.50697 | 2.177912 | -3.70449 |
| C | 1.928605 | -4.35193 | -6.50633 |
| C | 5.618665 | -0.14724 | -4.1001  |
| C | 2.379898 | 4.637033 | 1.343761 |
| C | -2.61083 | 6.660378 | 1.081895 |
| C | -0.70678 | 2.946312 | 5.198267 |
| H | -4.47092 | -4.37797 | 1.706081 |
| H | -4.52933 | -3.08354 | 0.456533 |
| H | -4.45688 | -2.64912 | 2.19154  |
| H | -3.82914 | -4.02478 | -2.39334 |
| H | -3.59832 | -4.0624  | -4.17044 |
| H | -5.18505 | -3.57221 | -3.48749 |
| H | 0.883735 | -7.68353 | -2.29629 |
| H | -0.05583 | -7.8239  | -0.77317 |
| H | 1.13103  | -6.4885  | -0.96697 |
| H | -7.32114 | 1.251789 | -0.64406 |
| H | -5.90387 | 2.345172 | -0.79669 |
| H | -6.79384 | 2.243191 | 0.753499 |
| H | 4.113093 | -4.43387 | -0.57608 |
| H | 4.243336 | -4.37122 | 1.213771 |
| H | 4.163895 | -2.84837 | 0.254811 |
| H | 5.143958 | 0.252618 | 2.241407 |
| H | 3.837603 | -0.98502 | 2.26033  |
| H | 3.612709 | 0.560914 | 3.125335 |
| H | 0.033989 | -2.99294 | 5.529761 |
| H | -1.26394 | -2.6584  | 4.33696  |
| H | -1.01964 | -1.55651 | 5.735389 |

|   |          |          |          |
|---|----------|----------|----------|
| H | 1.27863  | 1.81942  | -5.73177 |
| H | 1.570571 | 3.516925 | -5.2253  |
| H | 0.123045 | 2.640602 | -4.62128 |
| H | -4.23295 | 1.655011 | -3.0685  |
| H | -3.12867 | 1.479895 | -4.46425 |
| H | -3.98306 | 3.037571 | -4.1962  |
| H | 1.099862 | -4.85555 | -7.02336 |
| H | 2.576844 | -5.09679 | -6.02847 |
| H | 2.509276 | -3.76484 | -7.23156 |
| H | 5.924341 | -0.6012  | -5.05277 |
| H | 6.489114 | 0.321098 | -3.61991 |
| H | 4.835875 | 0.603874 | -4.26789 |
| H | 3.129841 | 5.320196 | 0.921162 |
| H | 2.816446 | 3.635921 | 1.453421 |
| H | 2.054537 | 5.018179 | 2.322465 |
| H | -2.91115 | 7.324149 | 0.25959  |
| H | -1.55406 | 6.384606 | 0.971011 |
| H | -2.77524 | 7.168195 | 2.042078 |
| H | 0.046368 | 3.32974  | 4.498166 |
| H | -0.2459  | 2.183014 | 5.841239 |
| H | -1.0867  | 3.76831  | 5.820268 |

21.  $\text{Au}_{14}\text{Ag}_4(\text{SCH}_3)_{14}$  : A1, A3, C1, C2

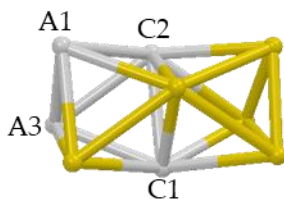

|    |          |          |          |
|----|----------|----------|----------|
| 88 |          |          |          |
| Au | -1.44398 | -1.27958 | 0.517013 |
| Au | 0.99958  | -2.4797  | -1.14781 |
| Ag | 0.965551 | 0.138512 | 0.459566 |
| Ag | -1.27572 | 0.86897  | -1.38664 |
| Au | -1.6321  | -4.77713 | -0.47447 |
| Au | -1.20465 | -1.80388 | -2.61787 |
| Au | 1.117995 | -0.20896 | -2.69005 |
| Au | 1.325948 | -2.51992 | 2.328472 |
| Au | -4.44691 | -0.74922 | -1.51693 |
| Au | 4.16556  | -0.33707 | -1.11501 |
| Au | -2.96871 | 1.136224 | 0.926199 |
| Ag | -0.63192 | 2.65761  | 0.870224 |
| Au | 1.529677 | 3.226369 | -1.6844  |

|    |          |          |          |
|----|----------|----------|----------|
| Au | -2.97459 | 3.944115 | -0.84747 |
| Ag | -0.90228 | 0.473097 | 2.793314 |
| Au | 0.18562  | -4.59577 | -3.68058 |
| Au | 3.078201 | -2.33128 | -4.0631  |
| Au | -2.81609 | 3.642092 | 2.775108 |
| S  | -2.15771 | 2.84834  | -2.78096 |
| S  | -2.30536 | -3.45608 | 1.368276 |
| S  | -3.52299 | -1.80949 | -3.4352  |
| S  | 1.964658 | -3.97511 | 0.551162 |
| S  | 3.36502  | 0.913784 | 0.726484 |
| S  | -5.27732 | 0.337224 | 0.438027 |
| S  | 2.157638 | 1.858415 | -3.52966 |
| S  | 0.87361  | 4.555263 | 0.17585  |
| S  | 0.664255 | -1.10226 | 4.104567 |
| S  | -0.90561 | -6.16346 | -2.26383 |
| S  | 5.039888 | -1.53106 | -2.98236 |
| S  | -3.73101 | 5.094305 | 1.104315 |
| S  | -2.07003 | 2.152528 | 4.454756 |
| S  | 1.207812 | -3.16085 | -5.28124 |
| C  | -4.1437  | -3.39031 | 1.305143 |
| C  | -4.10419 | -3.55652 | -3.3906  |
| C  | 0.467096 | -7.1387  | -1.50989 |
| C  | -6.27316 | 1.777804 | -0.13079 |
| C  | 3.798316 | -3.87418 | 0.423129 |
| C  | 4.076661 | 0.119802 | 2.228607 |
| C  | -0.55043 | -2.11138 | 5.058166 |
| C  | 1.105046 | 2.420315 | -4.93334 |
| C  | -3.63971 | 2.291395 | -3.72115 |
| C  | 1.921194 | -4.30399 | -6.54095 |
| C  | 5.651462 | -0.19307 | -4.09579 |
| C  | 2.337095 | 4.595417 | 1.29515  |
| C  | -2.68535 | 6.61246  | 1.167449 |
| C  | -0.64004 | 2.982811 | 5.269404 |
| H  | -4.53274 | -4.3877  | 1.552969 |
| H  | -4.50622 | -3.08008 | 0.316406 |
| H  | -4.48258 | -2.66431 | 2.057038 |
| H  | -3.86644 | -4.03915 | -2.43333 |
| H  | -3.59991 | -4.09528 | -4.20487 |
| H  | -5.18981 | -3.56662 | -3.55953 |
| H  | 0.979561 | -7.68525 | -2.31336 |
| H  | 0.018888 | -7.8539  | -0.80624 |
| H  | 1.172615 | -6.48737 | -0.97788 |
| H  | -7.17529 | 1.403085 | -0.634   |



|   |          |          |          |
|---|----------|----------|----------|
| H | -5.70281 | 2.423272 | -0.81149 |
| H | -6.5613  | 2.354078 | 0.759561 |
| H | 4.105556 | -4.44177 | -0.46632 |
| H | 4.235929 | -4.33206 | 1.321078 |
| H | 4.140463 | -2.83502 | 0.323722 |
| H | 5.167065 | 0.253369 | 2.22042  |
| H | 3.828927 | -0.94851 | 2.282754 |
| H | 3.652371 | 0.626058 | 3.107087 |
| H | -0.01184 | -2.89199 | 5.613088 |
| H | -1.29243 | -2.5777  | 4.396243 |
| H | -1.05776 | -1.44246 | 5.768219 |
| H | 1.193815 | 1.679828 | -5.74032 |
| H | 1.487204 | 3.390635 | -5.28026 |
| H | 0.056343 | 2.523687 | -4.62654 |
| H | -4.31644 | 1.689495 | -3.0998  |
| H | -3.286   | 1.674084 | -4.55911 |
| H | -4.17046 | 3.170083 | -4.11254 |
| H | 1.088704 | -4.79857 | -7.06054 |
| H | 2.575543 | -5.05706 | -6.08497 |
| H | 2.493499 | -3.70032 | -7.25906 |
| H | 5.961899 | -0.65313 | -5.04398 |
| H | 6.520597 | 0.273472 | -3.6116  |
| H | 4.873456 | 0.560603 | -4.27374 |
| H | 3.083223 | 5.282312 | 0.871957 |
| H | 2.780826 | 3.598266 | 1.411334 |
| H | 2.004489 | 4.978908 | 2.270418 |
| H | -3.00926 | 7.274243 | 0.352402 |
| H | -1.62053 | 6.372764 | 1.050525 |
| H | -2.86167 | 7.105563 | 2.133311 |
| H | 0.095331 | 3.347746 | 4.540725 |
| H | -0.15967 | 2.239655 | 5.92188  |
| H | -1.00279 | 3.822545 | 5.878114 |
